# Supplementary material for: Stereoselective construction of fluorinated indanone derivatives via a triple cascade Lewis acid-catalyzed reaction
Source: Royal Society of Chemistry journal article supplement (doi:10.1039/b702114c), 2007-01-01

# Electronic Supporting Information

## Stereoselective Construction of Fluorinated Indanone Derivatives via a Triple Cascade Lewis Acid-Catalyzed Reaction

Han-Feng Cui,<sup>a</sup> Ke-Yan Dong,<sup>a</sup> Guang-Wu Zhang,<sup>a</sup> Lian Wang,<sup>a</sup> Jun-An Ma<sup>\*a,b</sup>

<sup>a</sup> *Department of Chemistry, School of Science,*

*Tianjin University, Tianjin 300072,*

<sup>b</sup> *State Key Laboratory of Elemento-Organic Chemistry,*

*Nankai University, Tianjin 300071, China*

*majun\_an68@tju.edu.cn*

### Table of Contents

|                                                                     |                          |
|---------------------------------------------------------------------|--------------------------|
| <b>General information and materials</b>                            | <b>page 1 – page 2</b>   |
| <b>Tandem Product data</b>                                          | <b>Page 3 – page 10</b>  |
| <b>Copies of <sup>1</sup>H and <sup>13</sup>C NMR Spectral data</b> | <b>Page 11 – Page 33</b> |

**General information:**  $^1\text{H}$ ,  $^{13}\text{C}$ ,  $^{19}\text{F}$  NMR were recorded on Varian Mercury Plus 500 and 400 instruments at 500 MHz and 400 MHz ( $^1\text{H}$  NMR), 125 MHz ( $^{13}\text{C}$  NMR), as well as 376 MHz ( $^{19}\text{F}$  NMR), or a Bruker AV 300 Spectrometer at 300 MHz ( $^1\text{H}$  NMR), 75 MHz ( $^{13}\text{C}$  NMR). Chemical shifts were reported in ppm down field from internal  $\text{Me}_4\text{Si}$  and external  $\text{CCl}_3\text{F}$ , respectively. MS were recorded on a VG-7070E or HP 5988A spectrometer using the ESI method. Elemental analyses were determined on an MT-3 elemental analyzer. HPLC analyses were carried out on a Hewlett Packard Model HP 1200 instrument. All of the reactions were carried out under an argon atmosphere with the exclusion of moisture.

**Materials:** THF and toluene were distilled from sodium and benzophenone under nitrogen. DCM, DCE, and  $\text{MeNO}_2$  were distilled from calcium hydride before use. Analytical thin layer chromatography was performed on 0.20 mm Qingdao Haiyang silica gel plates. Silica gel (200-300 mesh) (from Qingdao Haiyang Chem. Company, Ltd.) was used for flash chromatography.

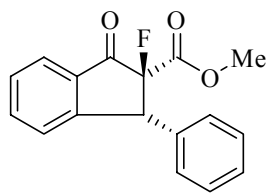

**2a**, yield 68%, M. p. 140-142 °C

**<sup>19</sup>F-NMR** (376MHz, CDCl<sub>3</sub>) δ [ppm] -162.3 (d, *J* = 24.1 Hz);

**<sup>1</sup>H-NMR** (500MHz, CDCl<sub>3</sub>) δ [ppm] 7.93 (d, *J* = 8.0 Hz, 1H), 7.75 (t, *J* = 7.5 Hz, 1H), 7.57 (t, *J* = 7.5 Hz, 1H), 7.45 (d, *J* = 8.0 Hz, 1H), 7.36-7.35 (m, 3H), 7.24-7.22 (m, 2H), 4.94 (d, *J* = 24.5 Hz, 1H), 3.28 (s, 3H);

**<sup>13</sup>C-NMR**(125MHz, CDCl<sub>3</sub>) δ [ppm] 195.3 (d, *J* = 18.3 Hz), 165.9 (d, *J* = 29.1 Hz), 151.8 (d, *J* = 6.8 Hz), 136.7, 135.6, 135.0 (d, *J* = 1.4 Hz), 129.6, 129.4, 128.8, 128.6, 127.1 (d, *J* = 1.5 Hz), 125.3 (d, *J* = 1.0 Hz), 99.9 (d, *J* = 204.8 Hz), 55.7 (d, *J* = 23.9 Hz), 52.3 (d, *J* = 1.1 Hz);

**IR** (KBr) ν (cm<sup>-1</sup>) 1763, 1721, 1603, 1456, 1292, 1208, 1145, 924, 758, 706;

**MS** (EI) *m/z* (%) 307.42 [M+Na]<sup>+</sup> (100%);

**Anal** Calcd for C<sub>17</sub>H<sub>13</sub>FO<sub>3</sub>: C 71.82%, H 4.61%; Found: C 71.40%, H 4.22%.

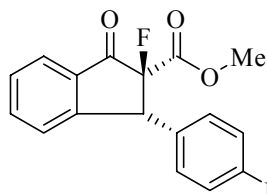

**2b**, yield 62%, M. p. 118-119.8 °C

**<sup>19</sup>F-NMR** (376MHz, CDCl<sub>3</sub>) δ [ppm] -162.7 (d, *J* = 24.1 Hz);

**<sup>1</sup>H-NMR** (400MHz, CDCl<sub>3</sub>) δ [ppm] 7.92 (d, *J* = 8.0 Hz, 1H), 7.73 (t, *J* = 7.6 Hz, 1H), 7.55 (t, *J* = 7.6 Hz, 1H), 7.42 (d, *J* = 7.6 Hz, 1H), 7.15 (d, *J* = 8.0 Hz, 2H), 7.09 (d, *J* = 8.0 Hz, 2H), 4.89 (d, *J* = 24.0 Hz, 1H), 3.29 (s, 3H), 2.35 (s, 3H);

**<sup>13</sup>C-NMR** (125MHz, CDCl<sub>3</sub>) δ [ppm] 195.4 (d, *J* = 18.4 Hz), 166.0 (d, *J* = 29.1 Hz), 152.1 (d, *J* = 6.9 Hz), 138.4, 136.7 (d, *J* = 2.5 Hz), 135.0 (d, *J* = 1.4 Hz), 132.4, 129.5, 129.4, 129.3, 129.2, 127.1, 125.2, 100.0 (d, *J* = 204.3 Hz), 55.5 (d, *J* = 9.6 Hz), 52.3 (d, *J* = 7.4 Hz), 21.4 (d, *J* = 4.9 Hz);

**IR** (KBr) ν (cm<sup>-1</sup>) 1769, 1730, 1603, 1450, 1293, 1240, 1209, 1071, 960, 806, 760, 689;

**MS** (EI) *m/z* (%) 321.47 [M+Na]<sup>+</sup>

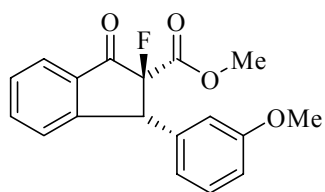

**2c**, yield 60%, M. p. 93-94 °C

**<sup>19</sup>F-NMR** (376MHz, CDCl<sub>3</sub>) δ [ppm] -162.4 (d, *J* = 24.4 Hz);

**<sup>1</sup>H-NMR** (300MHz, CDCl<sub>3</sub>) δ [ppm] 7.93 (d, *J* = 7.5 Hz, 1H), 7.75 (t, *J* = 7.5 Hz, 1H), 7.57 (t, *J* = 7.5 Hz, 1H), 7.45 (d, *J* = 7.8 Hz, 1H), 7.30-7.25 (m, 1H), 6.90-6.75 (m, 3H), 4.90 (d, *J* = 24.0 Hz, 1H), 3.78 (s, 3H), 3.32 (s, 3H);

**<sup>13</sup>C-NMR** (125MHz, CDCl<sub>3</sub>) δ [ppm] 195.3 (d, *J* = 18.1 Hz), 165.9 (d, *J* = 29.1 Hz), 160.0, 151.7 (d, *J* = 6.8 Hz), 136.7, 134.9 (d, *J* = 1.3 Hz), 129.8, 129.4, 127.2 (d, *J* = 1.5 Hz), 125.2 (d, *J* = 0.9 Hz), 121.9, 115.4, 113.9, 99.9 (d, *J* = 204.5 Hz), 55.6 (d, *J* = 23.9 Hz), 55.5, 52.4;

**IR** (KBr) ν (cm<sup>-1</sup>) 1769, 1729, 1597, 1492, 1438, 1042, 962, 903, 812, 738, 697, 639;

**MS** (EI) *m/z* (%) 337.28 [M+Na]<sup>+</sup> (40%), 315.25 [M+H]<sup>+</sup> (100%).

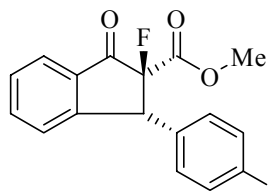

**2d**, yield 70%, M. p. 166-166.5 °C

**<sup>19</sup>F NMR** (376 MHz, CDCl<sub>3</sub>) δ [ppm] -162.5 (d, *J* = 24.1 Hz).

**<sup>1</sup>H NMR** (400 MHz, CDCl<sub>3</sub>) δ [ppm] 7.92 (d, *J* = 7.6 Hz, 1H), 7.73-7.77 (m, 1H), 7.55-7.59 (m, 1H), 7.39 (d, *J* = 7.6 Hz, 1H), 7.33 (d, *J* = 8.8 Hz, 2H), 7.16 (d, *J* = 8.8 Hz, 2H), 4.89 (d, *J* = 24.0 Hz, 1H), 3.32 (s, 3H);

**<sup>13</sup>C NMR** (75 MHz, CDCl<sub>3</sub>), δ [ppm] 194.8 (d, *J* = 18.5 Hz), 165.8 (d, *J* = 29.2 Hz), 151.2, 151.1, 136.9, 134.9, 134.7, 134.0, 130.9, 129.6, 129.0, 126.9, 125.4, 98.7 (d, *J* = 205.6 Hz), 55.1 (d, *J* = 24.1 Hz), 52.5.

**IR** (KBr) ν (cm<sup>-1</sup>) 1727, 1686, 1609, 1489, 1442, 1208, 1150, 854, 783.

**MS** (ESI) *m/z*: 319.07 [M+H]<sup>+</sup>.

**Anal.** Calcd. for C<sub>17</sub>H<sub>12</sub>ClFO<sub>3</sub>: C 64.06%, H 3.79%; Found C 64.52%, H 4.01%.

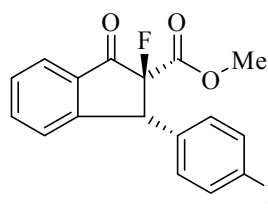

**2e**, yield 71%, M. p. 130-133 °C (*trans*)

**<sup>19</sup>F NMR** (376 MHz, CDCl<sub>3</sub>) δ -162.2 (d, *J* = 23.3 Hz).

**<sup>1</sup>H NMR** (400 MHz, CDCl<sub>3</sub>) δ 8.23 (d, *J* = 8.8 Hz, 2H), 7.96 (d, *J* = 7.6 Hz, 1H), 7.79 (t, *J* = 7.6 Hz, 1H), 7.62 (t, *J* = 7.6 Hz, 1H), 7.44 (d, *J* = 8.8 Hz, 2H), 7.39 (d, *J* = 7.6 Hz, 1H), 5.03 (d, *J* = 23.2 Hz, 1H), 3.33 (s, 3H);

**<sup>13</sup>C NMR** (125 MHz, CDCl<sub>3</sub>), 194.1 (d, *J* = 18.1 Hz), 165.5 (d, *J* = 28.8 Hz), 150.2, 150.0, 148.1, 142.9, 137.1, 134.8 (d, *J* = 1.4 Hz), 130.6, 130.0, 126.7 (d, *J* = 1.5 Hz), 125.7 (d, *J* = 1.0 Hz), 123.9, 99.4 (d, *J* = 207.6 Hz), 55.1 (d, *J* = 24.4 Hz), 52.7 (d, *J* = 1.1 Hz).

**IR** (KBr) ν (cm<sup>-1</sup>) 1768, 1728, 1604, 1523, 1355, 1235, 1108, 766.

**MS** (ESI) *m/z*: 330.73 [M+H]<sup>+</sup>.

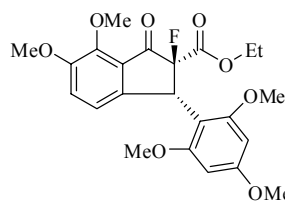

**2f**, yield 15%, M. p. 149-150.5 °C

**<sup>19</sup>F NMR** (376 MHz, CDCl<sub>3</sub>) δ -151.6 (d, *J* = 27.4 Hz).

**<sup>1</sup>H NMR** (400 MHz, CDCl<sub>3</sub>) δ 7.10 (d, *J* = 8.4 Hz, 1H), 6.78 (d, *J* = 8.4 Hz, 1H), 6.15 (d, *J* = 1.2 Hz, 1H), 5.93 (d, *J* = 1.5 Hz, 1H), 5.29 (d, *J* = 27.6 Hz, 1H), 4.07 (s, 3H), 4.05-3.81 (m, 8H), 3.77 (s, 3H), 3.30 (s, 3H), 0.95 (t, *J* = 6.8 Hz, 3H);

**<sup>13</sup>C NMR** (125 MHz, CDCl<sub>3</sub>), δ 192.6 (d, *J* = 19.1 Hz), 165.9 (d, *J* = 27.1 Hz), 161.1, 159.7, 159.5, 151.0, 147.8, 146.9 (d, *J* = 4.3 Hz), 126.2, 120.7, 105.6 (d, *J* = 3.9 Hz), 99.1 (d, *J* = 197.0 Hz), 91.2, 90.8, 62.1, 61.6, 57.1, 56.4, 55.5, 55.0, 44.6 (d, *J* = 27.1 Hz), 13.9.

**IR** (KBr) ν (cm<sup>-1</sup>) 1763, 1720, 1606, 1589, 1499, 1275, 1125, 1070, 814.

**MS** (ESI) *m/z*: 471.24 [M+Na]<sup>+</sup>, 449.36 [M+H]<sup>+</sup>.

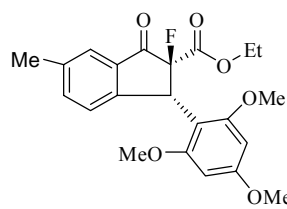

**2g**, yield 12%, M. p. 126-132 °C (*trans/cis*: 3/1)

**<sup>19</sup>F NMR** (376 MHz, CDCl<sub>3</sub>) δ -149.0 (*trans*) (d, *J* = 28.5 Hz), -152.1 (*cis*) (d, *J* = 27.4 Hz).

**<sup>1</sup>H NMR** (500 MHz, CDCl<sub>3</sub>) δ 7.64-7.71 (m, 1H), 7.29-7.38 (m, 2H), 6.18 (*cis*) and 6.15 (*trans*) (d, *J* = 2.5 Hz, 1H), 5.94 (*cis*) and 5.88 (*trans*) (d, *J* = 2.0 Hz, 1H), 5.36 (*cis*) and 5.33 (*trans*) (d, *J* = 28.5 Hz, 1H), 3.98-4.02 (m, 1H), 3.91 (*trans*) and 3.89 (*cis*) (s, 3H), 3.83-3.88 (m, 1H), 3.79 (*cis*) and 3.77 (*trans*) (s, 3H), 3.26 (*cis*) and 3.23 (*trans*) (s, 3H), 2.42 (*cis*) and 2.00 (*trans*) (s, 3H), 0.93-0.97 (m, 3H);

**<sup>13</sup>C NMR** (125 MHz, CDCl<sub>3</sub>) (*trans / cis*), δ 195.4 (d, *J* = 18.6 Hz), 166.3 (d, *J* = 27.0 Hz), 166.2 (d, *J* = 26.4 Hz), 161.4, 160.1, 159.1, 153.4 (d, *J* = 1.5 Hz), 137.6, 137.0, 136.7, 136.0, 134.5, 134.0, 127.9, 125.5, 124.5, 122.2, 104.8 (d, *J* = 5.9 Hz), 98.9 (d, *J* = 195 Hz), 97.3 (d, *J* = 192.6 Hz), 91.1, 90.9, 90.8, 90.7, 61.6, 61.5, 56.5, 56.4, 55.5, 55.4, 55.1, 55.0, 45.7 (d, *J* = 27.8 Hz), 45.4 (d, *J* = 27.8 Hz), 21.3, 17.7, 13.9.

**IR** (KBr) ν (cm<sup>-1</sup>) 1760, 1719, 1605, 1588, 1467, 1230, 1159, 1124, 812.

**MS** (ESI) *m/z*: 425.35 [M+Na]<sup>+</sup>, 403.14 [M+H]<sup>+</sup>.

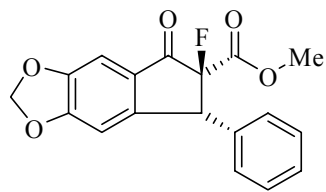

**2h**, yield 72%, M. p. 241-241.5 °C

**<sup>19</sup>F NMR** (376 MHz, CDCl<sub>3</sub>) δ -160.4 (d, *J* = 23.7 Hz).

**<sup>1</sup>H NMR** (400 MHz, CDCl<sub>3</sub>) δ 7.19-7.34 (m, 6H), 6.75 (s, 1H), 6.15 (s, 1H), 6.13 (s, 1H), 4.79 (d, *J* = 23.6 Hz, 1H), 3.26 (s, 3H);

**<sup>13</sup>C NMR** (125 MHz, CDCl<sub>3</sub>), δ 193.0 (d, *J* = 18.5 Hz), 166.1 (d, *J* = 29.3 Hz), 155.9, 150.0, 149.9, 149.8, 135.5, 129.8 (d, *J* = 1.4 Hz), 129.5, 128.8, 128.6, 106.3 (d, *J* = 1.5 Hz), 103.3 (d, *J* = 0.9 Hz), 103.0, 100.0 (d, *J* = 203.8 Hz), 55.4 (d, *J* = 24.4 Hz), 52.3 (d, *J* = 1.0 Hz).

**IR** (KBr) ν (cm<sup>-1</sup>) 1767, 1709, 1608, 1497, 1415, 1314, 1262, 1033, 926, 704.

**MS** (ESI)  $m/z$ : 351.40  $[M+Na]^+$ .

**Anal.** Calcd. For  $C_{18}H_{13}FO_5$ : C 65.85%, H 3.99%; Found C 65.62%, H 3.75%.

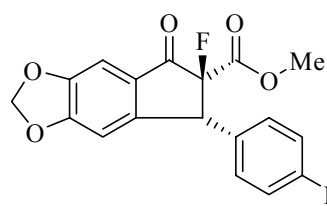

**2i**, yield 45%, M. p. 96-98 °C

**$^{19}F$  NMR** (376 MHz,  $CDCl_3$ )  $\delta$  -160.7 (d,  $J = 24.1$  Hz).

**$^1H$  NMR** (300 MHz,  $CDCl_3$ )  $\delta$  7.07-7.27 (m, 5H), 6.74 (s, 1H), 6.15 (s, 1H), 6.13 (s, 1H), 4.78 (d,  $J = 23.7$  Hz, 1H), 3.29 (s, 3H), 2.34 (s, 3H);

**$^{13}C$  NMR** (75 MHz,  $CDCl_3$ ),  $\delta$  193.1 (d,  $J = 18.5$  Hz), 166.1 (d,  $J = 28.8$  Hz), 155.9, 150.3 (d,  $J = 7.1$  Hz), 149.7, 138.4, 132.3, 130.0, 129.7, 129.4, 127.9, 106.3, 103.3, 103.0, 100.1 (d,  $J = 203.1$  Hz), 55.1 (d,  $J = 24.2$  Hz), 52.3, 21.3.

**IR** (KBr)  $\nu$  ( $cm^{-1}$ ) 1767, 1717, 1609, 1475, 1308, 1258, 1038, 1258, 1034, 937.

**MS** (ESI)  $m/z$ : 365.00  $[M+Na]^+$ .

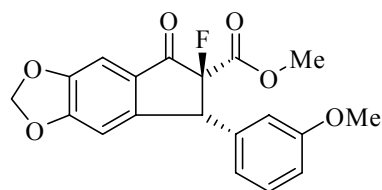

**2j**, yield 65%, M. p. 130-131 °C

**$^{19}F$  NMR** (376 MHz,  $CDCl_3$ )  $\delta$  -160.3 (d,  $J = 23.7$  Hz).

**$^1H$  NMR** (300 MHz,  $CDCl_3$ )  $\delta$  7.23-7.29 (m, 2H), 6.85-6.88 (m, 1H), 6.72-6.80 (m, 3H), 6.14-6.16 (m, 2H), 4.78 (d,  $J = 23.7$  Hz, 1H), 3.79 (s, 3H), 3.32 (s, 3H);

**$^{13}C$  NMR** (125 MHz,  $CDCl_3$ ), 193.0 (d,  $J = 18.5$  Hz), 166.0 (d,  $J = 28.1$  Hz), 159.9, 149.9 (d,  $J = 7.0$  Hz), 149.7, 137.0, 129.8 (d,  $J = 6.4$  Hz), 128.3, 127.0, 121.9, 115.4, 113.8, 106.4 (d,  $J = 1.3$  Hz), 103.2, 99.9 (d,  $J = 203.6$  Hz), 55.4 (d,  $J = 24.8$  Hz), 52.3, 46.3.

**IR** (KBr)  $\nu$  ( $cm^{-1}$ ) 1770, 1714, 1609, 1478, 1313, 1271, 1032, 936.

**MS** (ESI)  $m/z$ : 381.21  $[M+Na]^+$ , 358.55  $[M]^+$ .

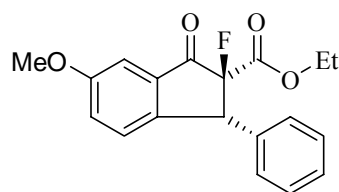

**2k**, yield 50%, M. p. 90-91.5 °C

**<sup>19</sup>F-NMR** (376MHz, CDCl<sub>3</sub>) δ [ppm] -161.1 (d, *J* = 24.4 Hz);

**<sup>1</sup>H-NMR** (500MHz, CDCl<sub>3</sub>) δ [ppm] 7.34-7.32 (m, 6H), 7.24-7.22 (m, 2H), 4.86 (d, *J* = 24.5 Hz, 1H), 3.91 (s, 3H), 3.85-3.77 (m, 1H), 3.69-3.63 (m, 1H), 0.84 (t, *J* = 7.0 Hz, 3H);

**<sup>13</sup>C-NMR** (125MHz, CDCl<sub>3</sub>) δ [ppm] 195.6 (d, *J* = 18.4 Hz), 165.7 (d, *J* = 28.4 Hz), 160.7, 144.8 (d, *J* = 6.6 Hz), 136.3 (d, *J* = 1.3 Hz), 135.9, 129.6, 128.7, 128.5, 128.0 (d, *J* = 1.4 Hz), 126.1, 106.1, 100.0 (d, *J* = 205.5 Hz), 62.1, 56.0, 55.0 (d, *J* = 24 Hz), 13.8;

**IR** (KBr) ν (cm<sup>-1</sup>) 1768, 1724, 1613, 1492, 1458, 1371, 1335, 1285, 1252, 1203, 1177, 1134, 1097, 1025, 966, 851, 824, 796, 706;

**MS** (EI) *m/z* (%) 327.21 [M-H]<sup>+</sup>.

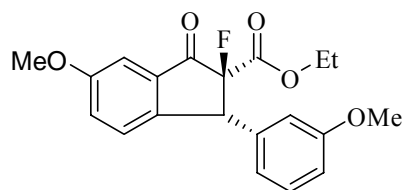

**2l**, yield 59%

**<sup>19</sup>F-NMR** (376MHz, CDCl<sub>3</sub>) δ [ppm] -160.9 (d, *J* = 24.1 Hz);

**<sup>1</sup>H-NMR** (500MHz, CDCl<sub>3</sub>) δ [ppm] 7.35-7.30 (m, 3H), 7.26-7.23 (d, *J* = 8.0 Hz, 1H), 6.87-6.85 (m, 1H), 6.82 (d, *J* = 7.5 Hz, 1H), 6.75 (t, *J* = 2.0 Hz, 1H), 4.83 (d, *J* = 24.0 Hz, 1H), 3.91 (s, 3H), 3.87-3.82 (m, 1H), 3.77 (s, 3H), 3.76-3.68 (m, 1H), 0.87 (t, *J* = 7.5 Hz, 3H);

**<sup>13</sup>C-NMR** (125MHz, CDCl<sub>3</sub>) δ [ppm] 195.5 (d, *J* = 18.4 Hz), 165.7 (d, *J* = 28.4 Hz), 160.7, 159.9, 144.7 (d, *J* = 6.6 Hz), 136.2 (d, *J* = 1.3 Hz), 129.7, 128.1 (d, *J* = 1.5 Hz), 126.1, 122.0, 115.5, 113.8, 106.0, 99.9 (d, *J* = 205.3 Hz), 62.1, 56.0, 55.5, 55.0 (d, *J* = 24.0 Hz), 13.8;

**IR** (KBr) ν (cm<sup>-1</sup>) 1763, 1727, 1610, 1495, 1435, 1370, 1336, 1283, 1172, 1042, 968, 860, 796, 738;



**MS** (EI)  $m/z$  (%) 339.77  $[M-F]^+$  (100%).

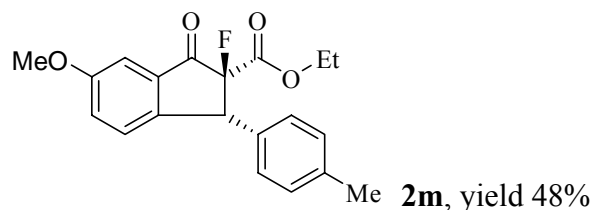

**$^{19}\text{F-NMR}$**  (376MHz,  $\text{CDCl}_3$ )  $\delta$  [ppm] -161.2 (d,  $J = 24.4$  Hz), -161.4 (d,  $J = 24.1$  Hz);

**$^1\text{H-NMR}$**  (500MHz,  $\text{CDCl}_3$ )  $\delta$  [ppm] 7.32-7.31 (m, 3H), 7.12 (m, 4H), 4.82 (d,  $J = 24.0$  Hz, 1H), 3.90 (s, 3H), 3.86-3.80 (m, 1H), 3.71-3.65 (m, 1H), 2.34 (s, 3H), 0.87 (t,  $J = 7.0$  Hz, 3H);

**$^{13}\text{C-NMR}$**  (125MHz,  $\text{CDCl}_3$ )  $\delta$  [ppm] 195.7 (d,  $J = 18.5$  Hz), 165.8 (d,  $J = 28.5$  Hz), 160.7, 145.0 (d,  $J = 6.8$  Hz), 138.3, 136.3 (d,  $J = 1.4$  Hz), 132.8, 129.5, 129.4, 128.0 (d,  $J = 1.4$  Hz), 126.0, 106.0, 100.1 (d,  $J = 204.8$  Hz), 62.0, 56.0, 54.7 (d,  $J = 24.0$  Hz), 21.3, 13.8;

**IR** (KBr)  $\nu$  ( $\text{cm}^{-1}$ ) 1763, 1727, 1610, 1495, 1435, 1370, 1336, 1283, 1172, 1042, 968, 860, 796, 738, 699, 641, 557, 527, 456, 416;

**MS** (EI)  $m/z$  (%) 341.27  $[M-H]^+$ .

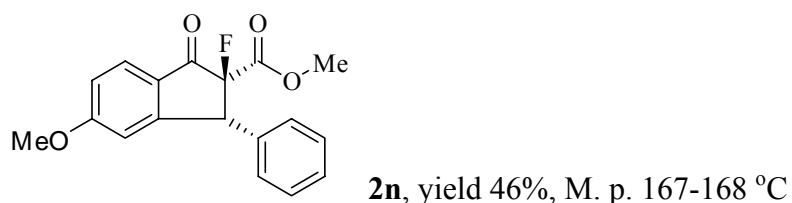

**$^{19}\text{F-NMR}$**  (376MHz,  $\text{CDCl}_3$ )  $\delta$  [ppm] -161.1 (d,  $J = 24.1$  Hz);

**$^1\text{H-NMR}$**  (300MHz,  $\text{CDCl}_3$ )  $\delta$  [ppm] 7.88 (d,  $J = 8.7$  Hz, 1H), 7.38-7.35 (m, 3H), 7.27-7.23 (m, 2H), 7.09 (dd,  $J = 8.4$  Hz,  $J = 1.5$  Hz, 1H), 6.83 (d,  $J = 1.2$  Hz, 1H), 4.88 (d,  $J = 24.0$  Hz, 1H), 3.88 (s, 3H), 3.28 (s, 3H);

**$^{13}\text{C-NMR}$**  (125MHz,  $\text{CDCl}_3$ )  $\delta$  [ppm] 193.1 (d,  $J = 18.3$  Hz), 167.0, 166.2 (d,  $J = 29.4$  Hz), 155.0 (d,  $J = 6.9$  Hz), 135.5, 129.6, 128.8, 128.6, 128.2 (d,  $J = 1.4$  Hz), 127.2, 127.1, 117.4 (d,  $J = 2.0$  Hz), 110.4 (d,  $J = 5.9$  Hz), 101.2 (d,  $J = 203.5$  Hz), 56.2 (d,  $J = 7.1$  Hz), 55.7 (dd,  $J = 24.4$  Hz,  $J = 9.4$  Hz), 52.3 (d,  $J = 7.4$  Hz);

**IR** (KBr)  $\nu$  ( $\text{cm}^{-1}$ ) 1768, 1714, 1597, 1493, 1447, 1307, 1284, 1250, 1093, 1019, 943,

839, 816;

**MS** (EI)  $m/z$  (%) 337 [M+Na]<sup>+</sup> (100%).

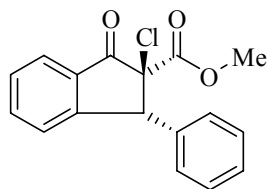

**3**, yield 44%, M. p. 132-134 °C

**<sup>1</sup>H-NMR** (300MHz, CDCl<sub>3</sub>) δ [ppm] 8.01 (d, *J* = 7.8 Hz, 1H), 7.81-7.76 (m, 1H), 7.64-7.59 (m, 1H), 7.46-7.37 (m, 4H), 7.25-7.22 (m, 2H), 5.13 (s, 1H), 3.25 (s, 3H);

**<sup>13</sup>C-NMR** (100MHz, CDCl<sub>3</sub>) δ [ppm] 195.3, 166.2, 152.1, 136.5, 136.3, 134.7, 129.5, 129.4, 128.7, 126.9, 125.6, 61.3, 53.1;

**IR** (KBr)  $\nu$  (cm<sup>-1</sup>) 1754, 1726, 1599, 1496, 1455, 1323, 1272, 1206, 1101, 1074, 1024, 989, 879, 856, 822;

**MS** (EI)  $m/z$  (%) 339.59 [M+K]<sup>+</sup> (100%).

**Anal Calcd** For C<sub>17</sub>H<sub>13</sub>ClO<sub>3</sub>: C 67.89%, H 4.36%; Found C 67.44%, H 3.99%.

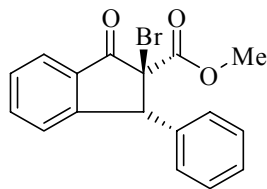

**4**, yield 60%, M. p. 131-133.5 °C

**<sup>1</sup>H-NMR** (400MHz, CDCl<sub>3</sub>) δ [ppm] 7.96 (d, *J* = 7.6 Hz, 1H), 7.73 (t, *J* = 7.6 Hz, 1H), 7.56 (t, *J* = 7.6 Hz, 1H), 7.40-7.18 (m, 6H), 5.07 (s, 1H), 3.20 (s, 3H);

**<sup>13</sup>C-NMR** (75MHz, CDCl<sub>3</sub>) δ [ppm] 195.3, 166.3, 152.1, 136.6, 136.3, 134.7, 129.5, 129.4, 128.8, 126.9, 125.6, 61.2 (d, *J* = 9.5 Hz), 53.1 (d, *J* = 9.3 Hz);

**IR** (KBr)  $\nu$  (cm<sup>-1</sup>) 1757, 1726, 1599, 1493, 1456, 1318, 1272, 1206, 1081, 1023, 989, 892, 797, 754, 704;

**MS** (EI)  $m/z$  (%) 265.45 [M-Br]<sup>+</sup> (100%).

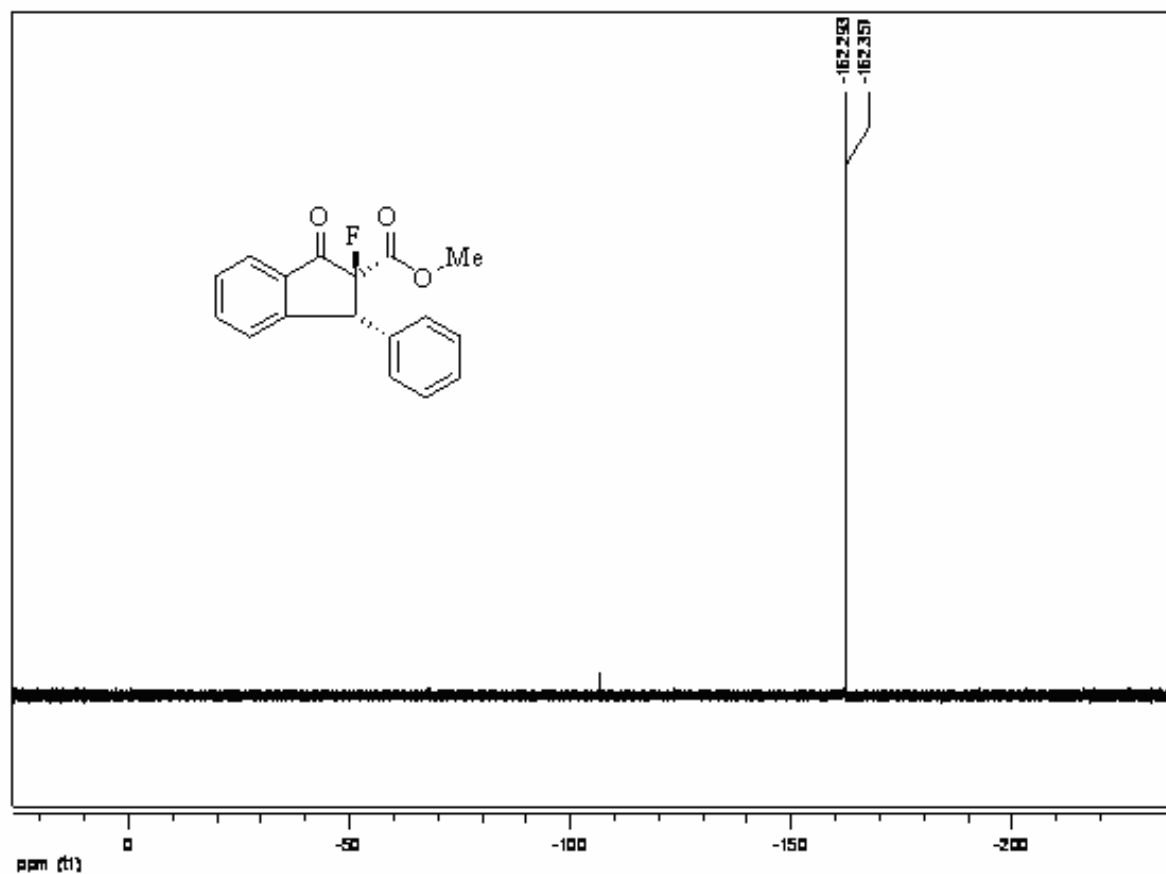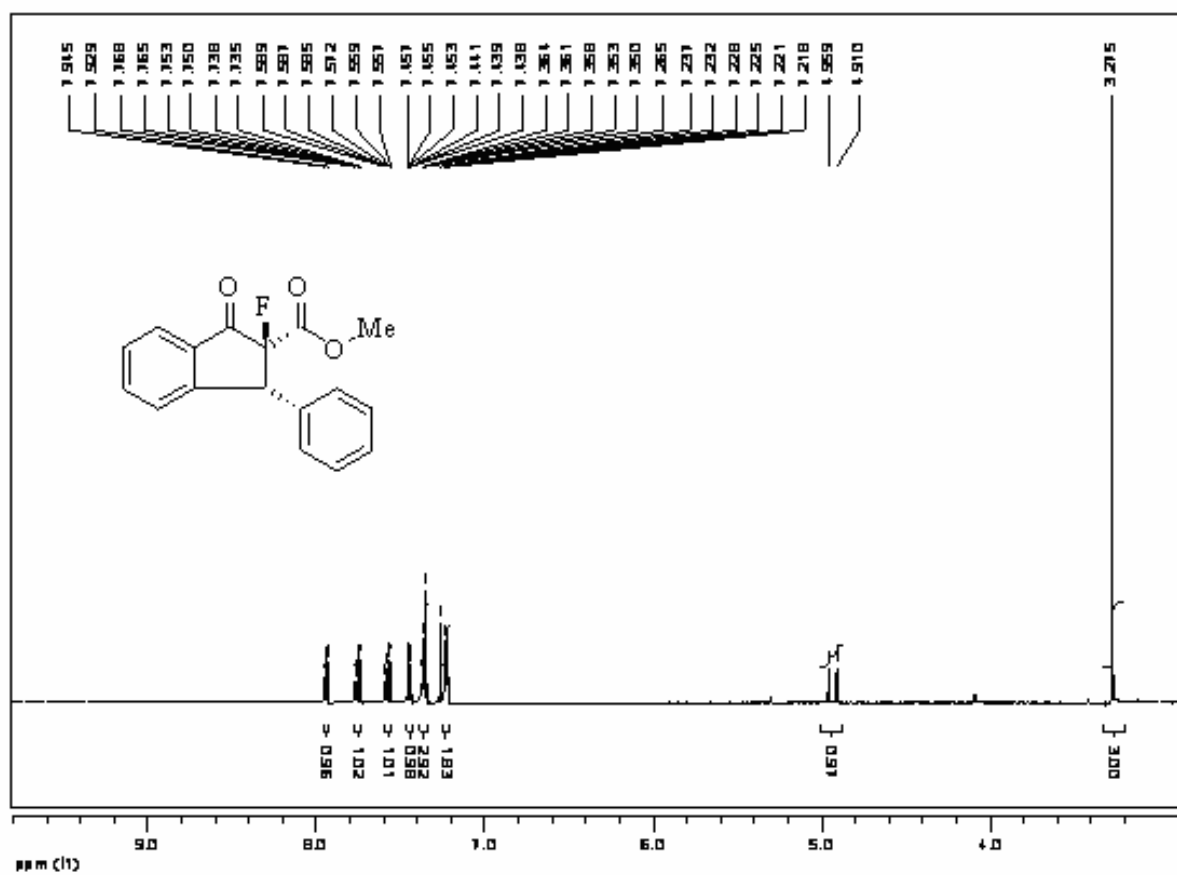

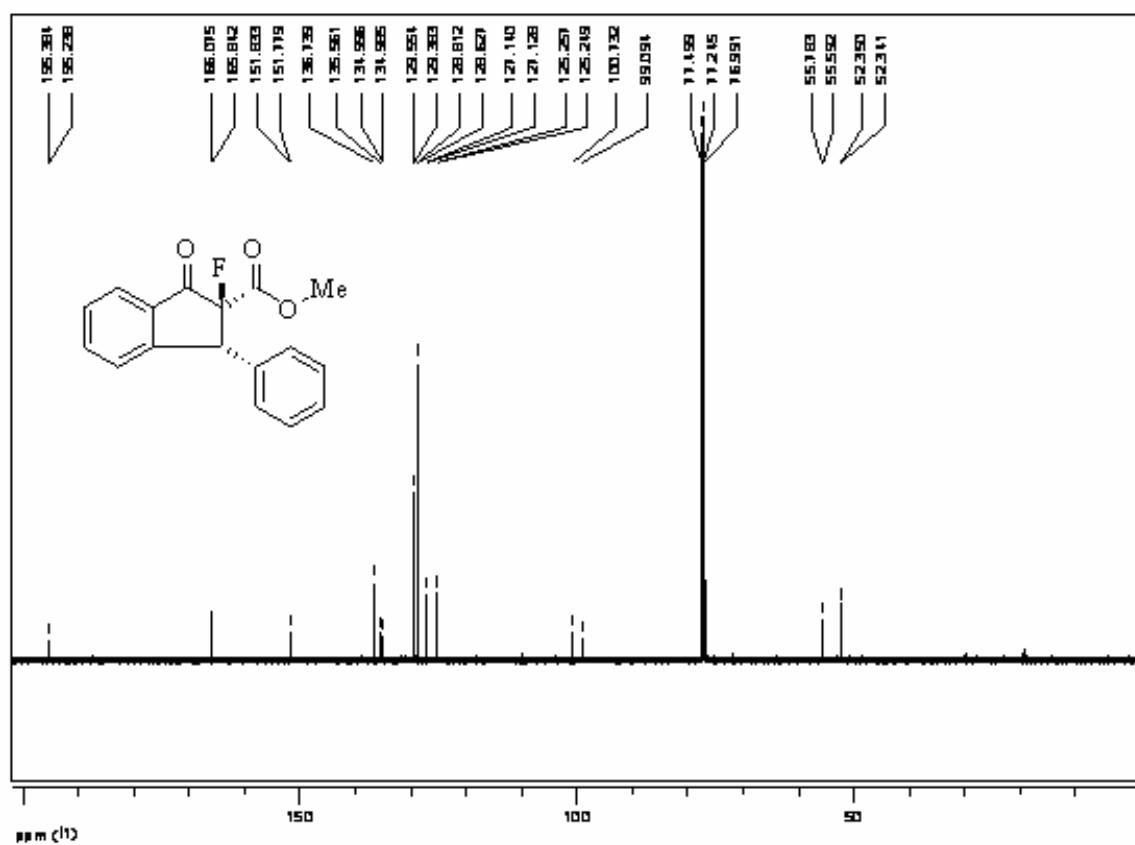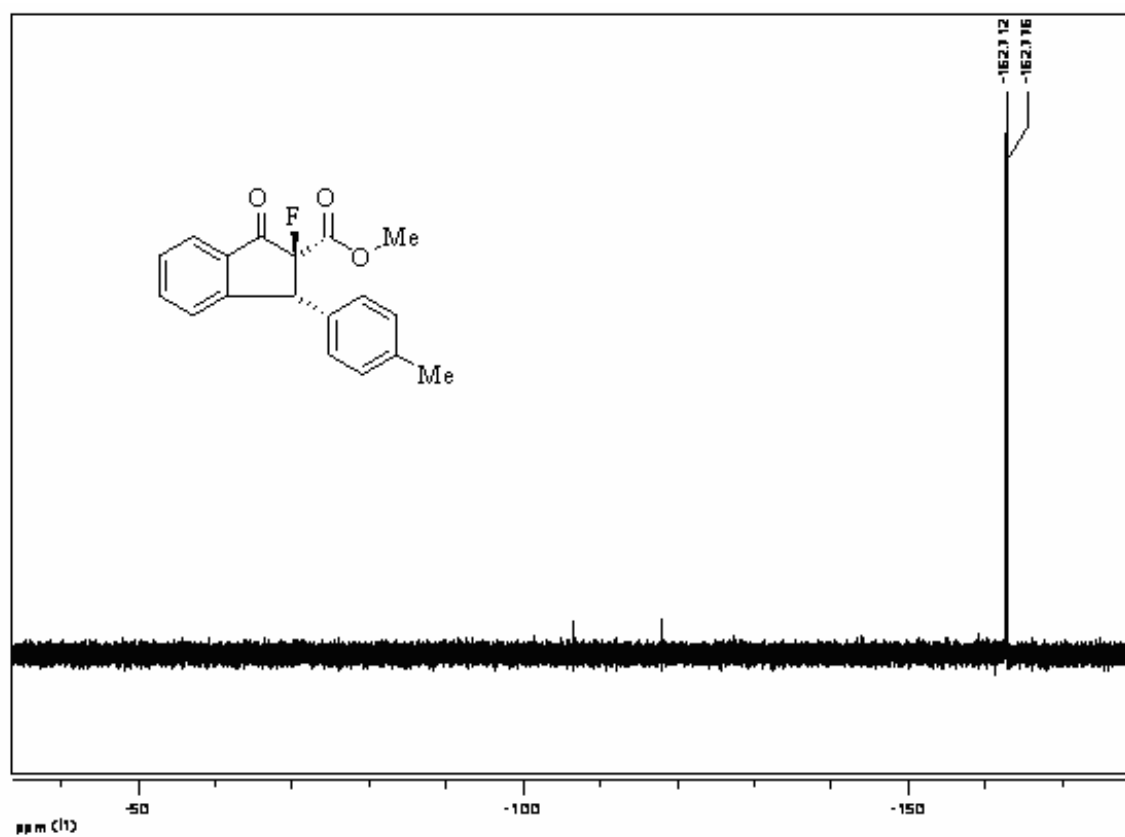



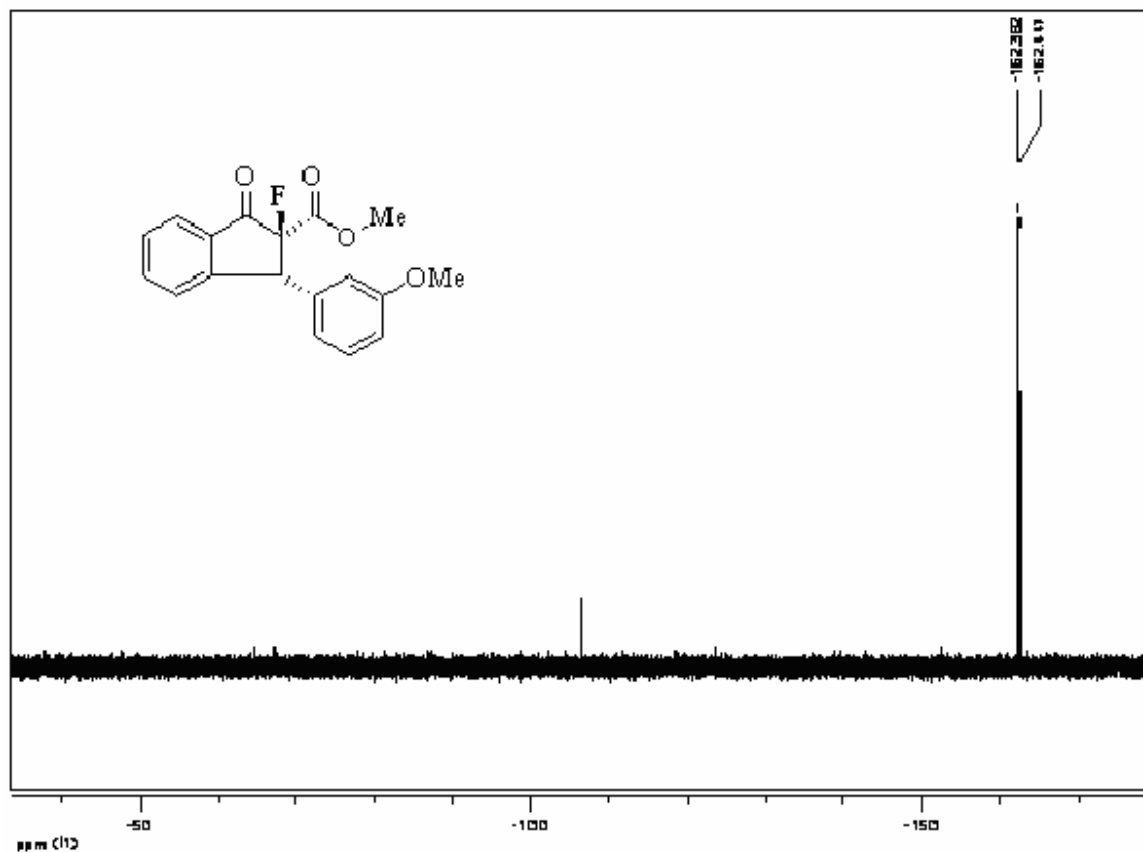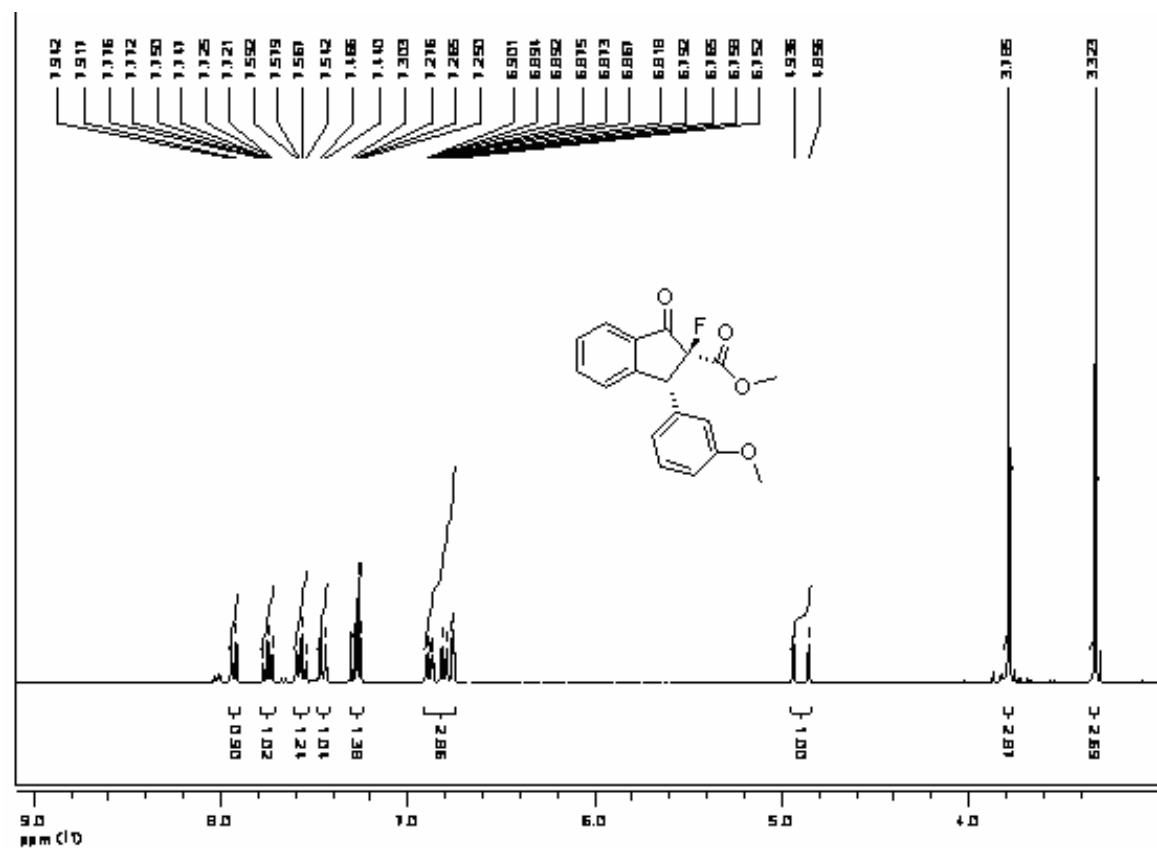

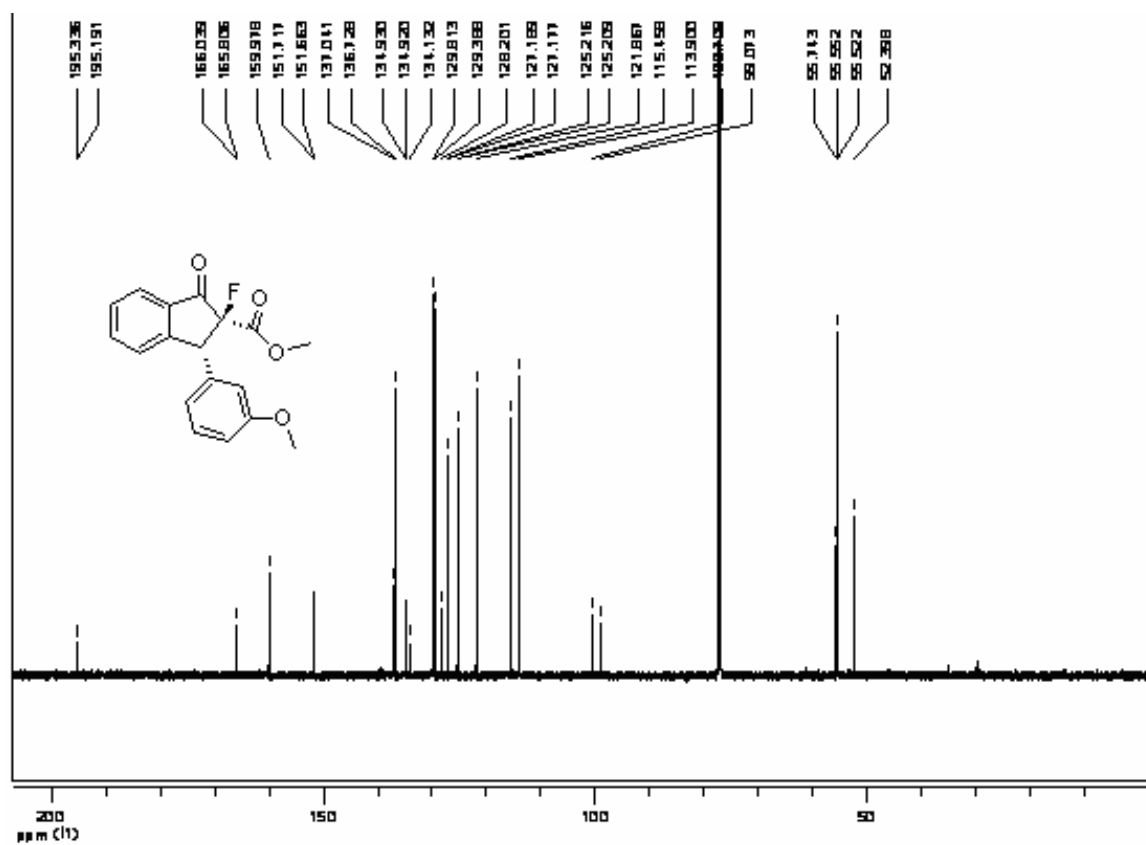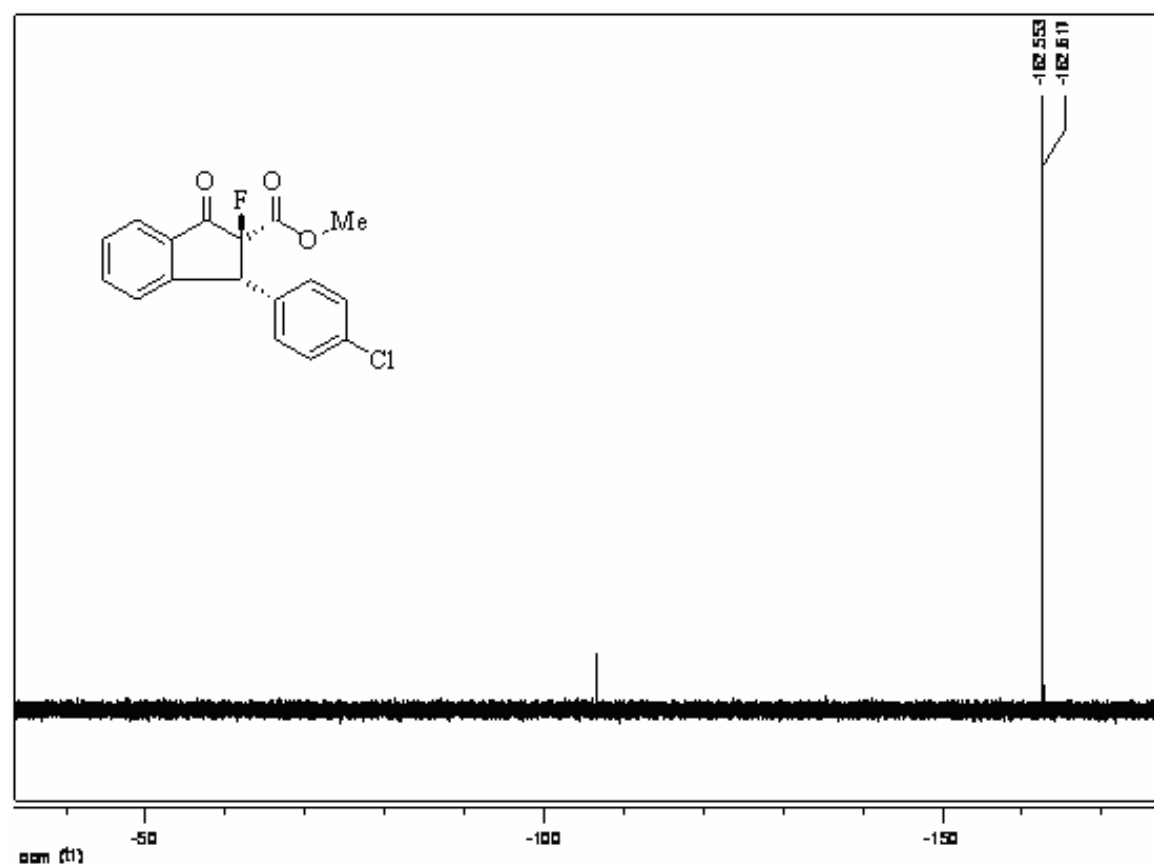

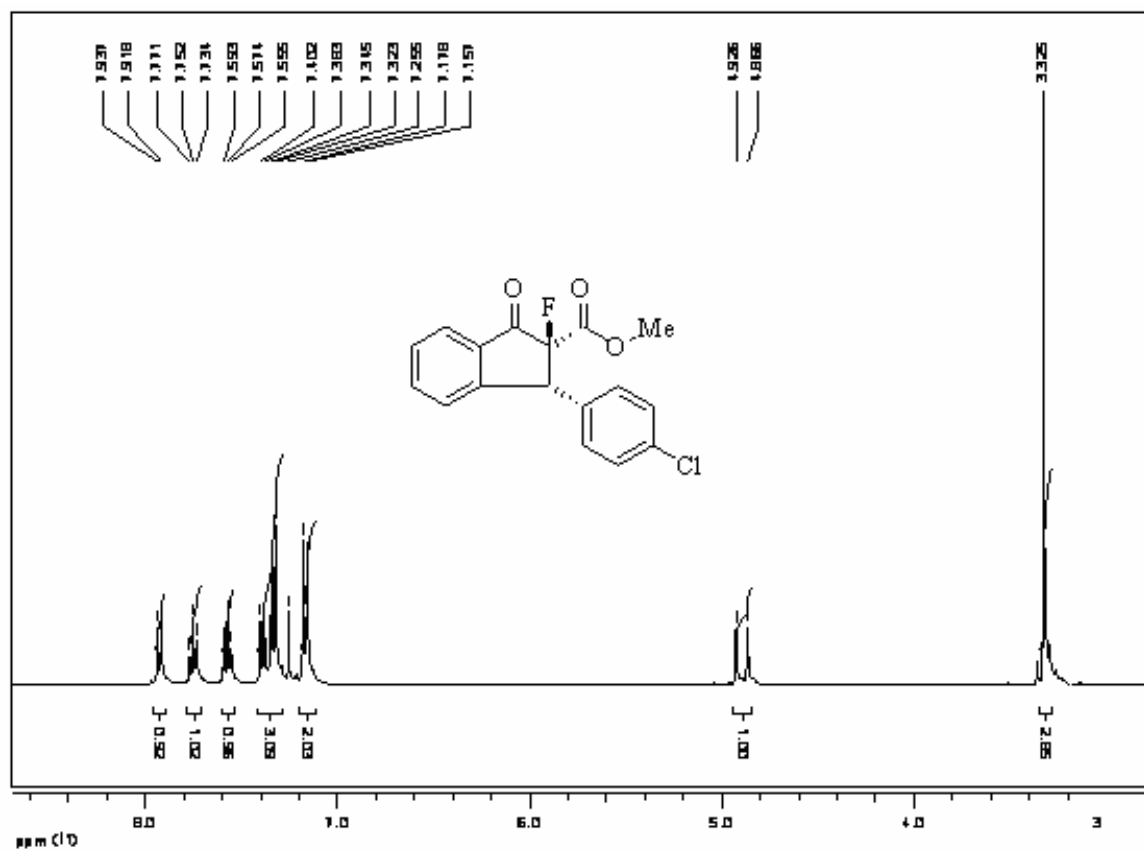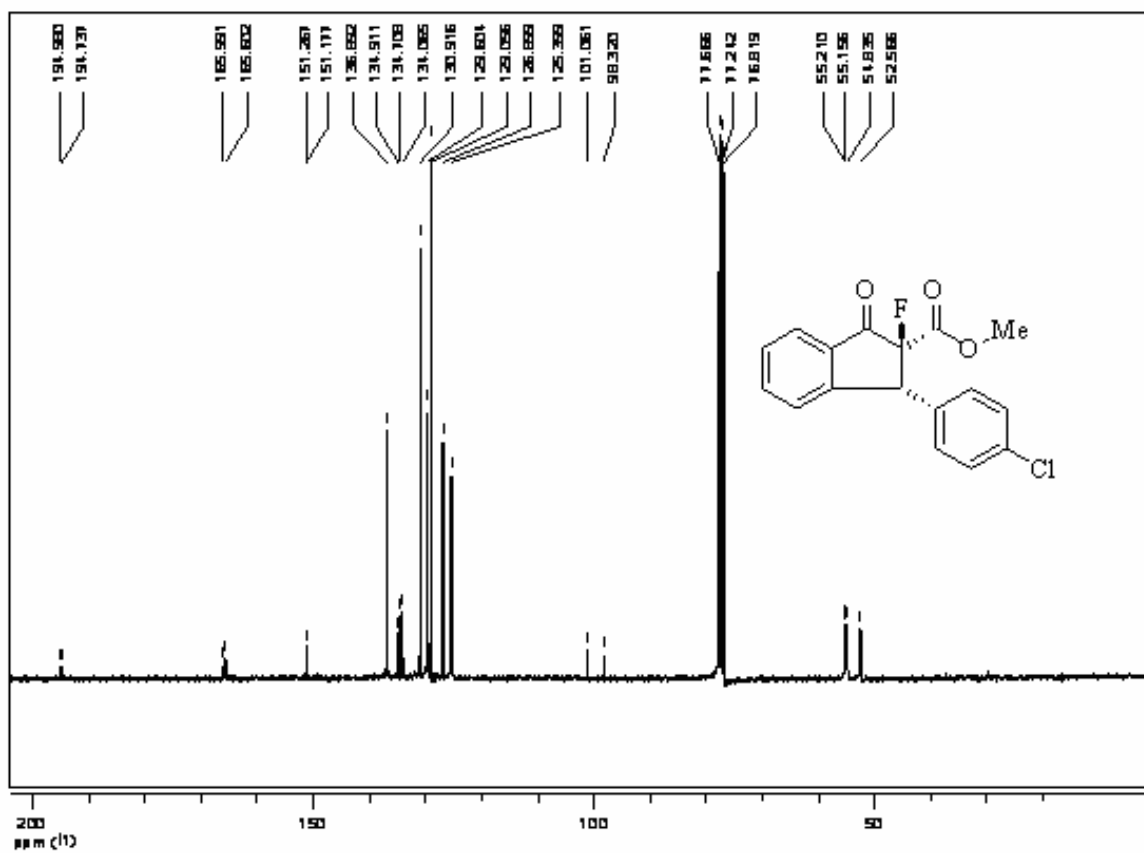





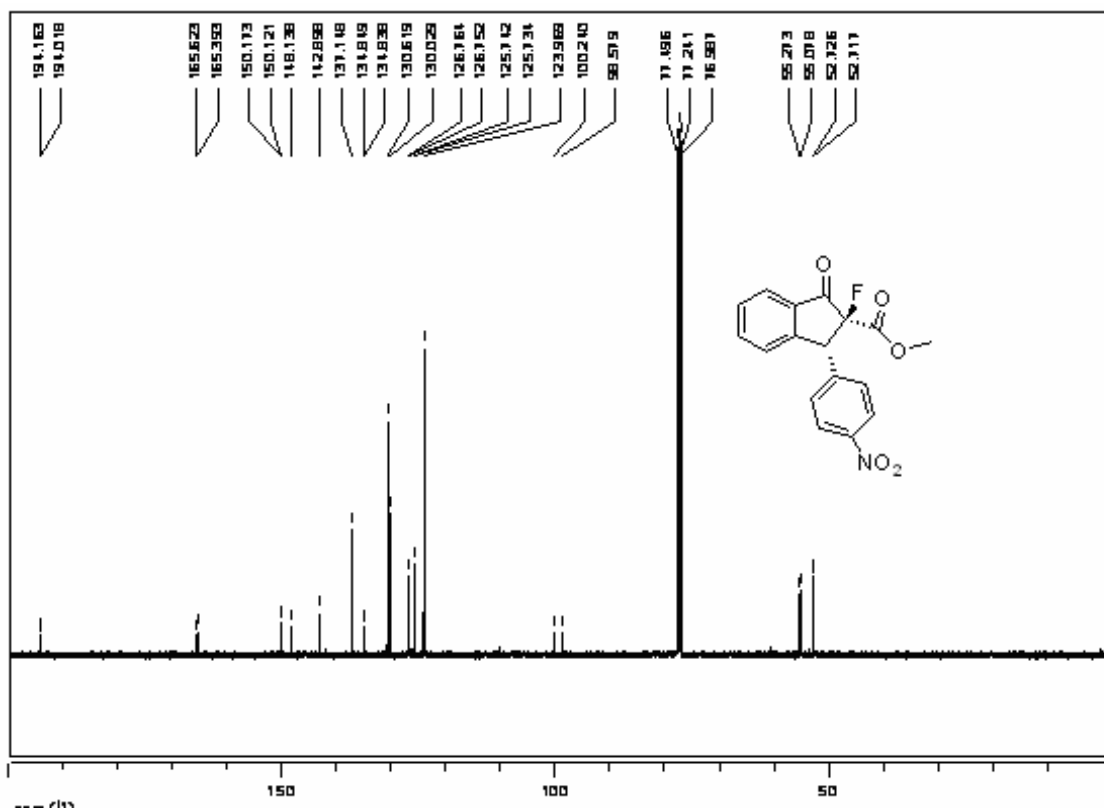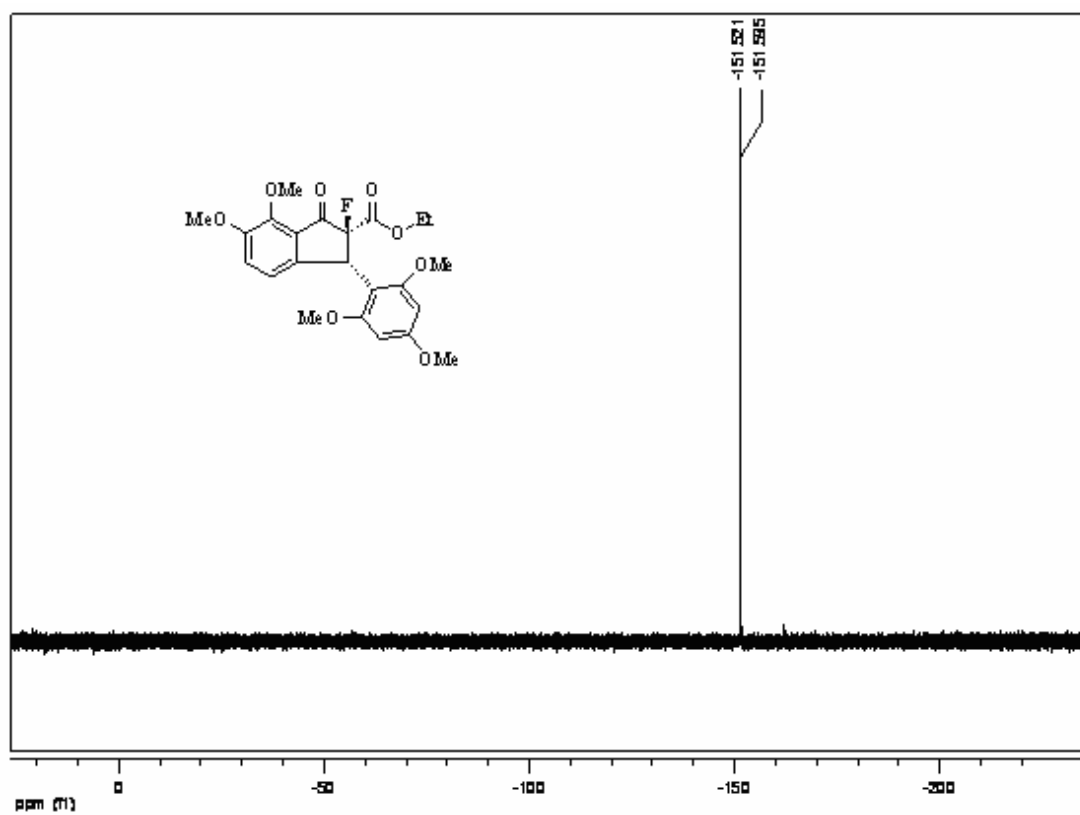

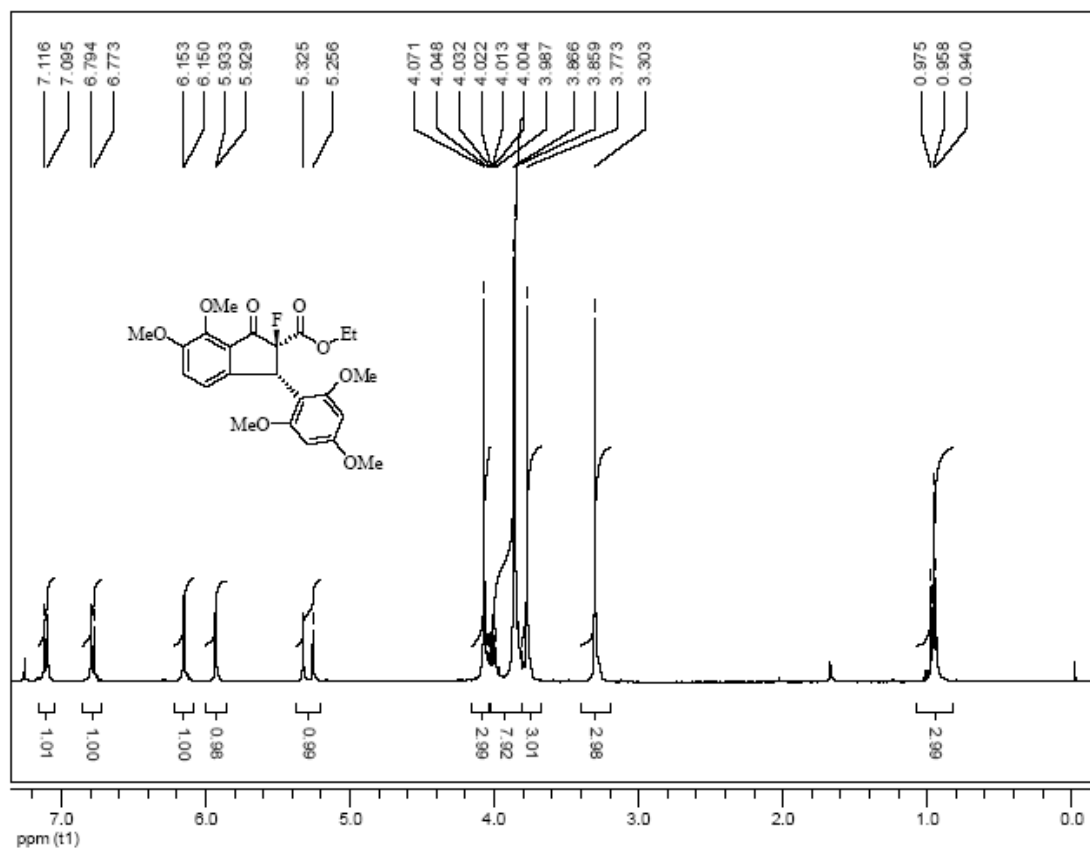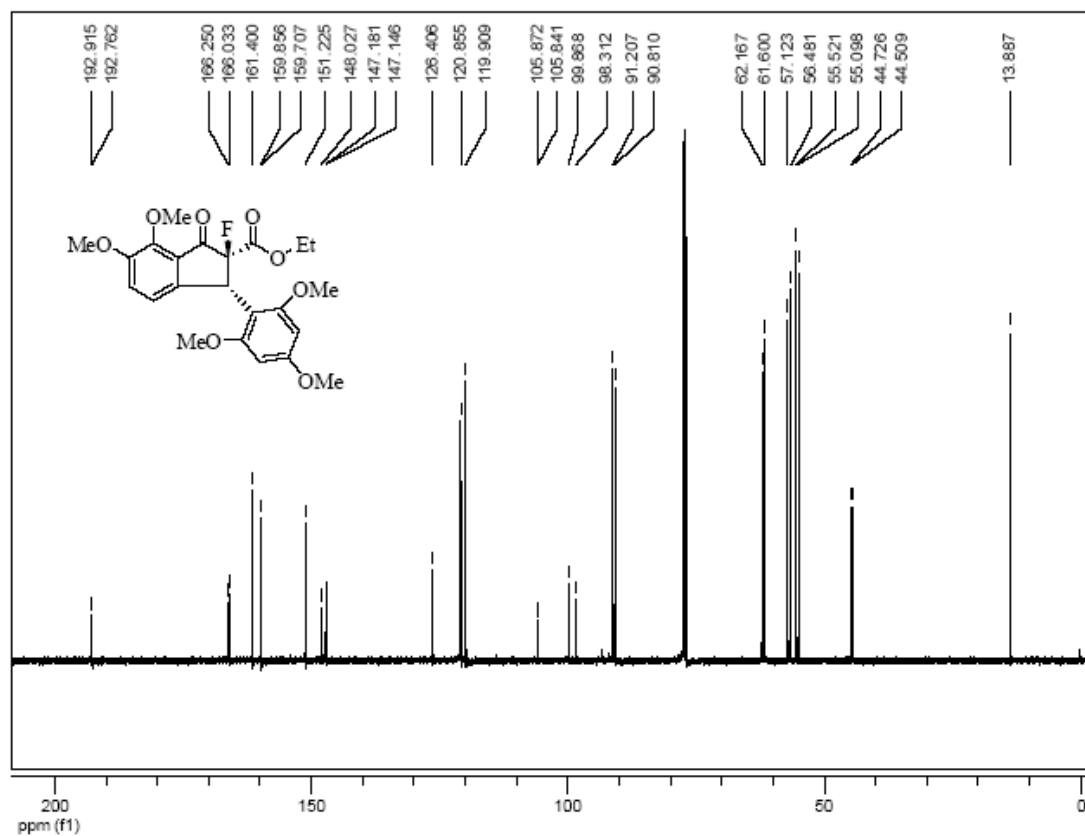

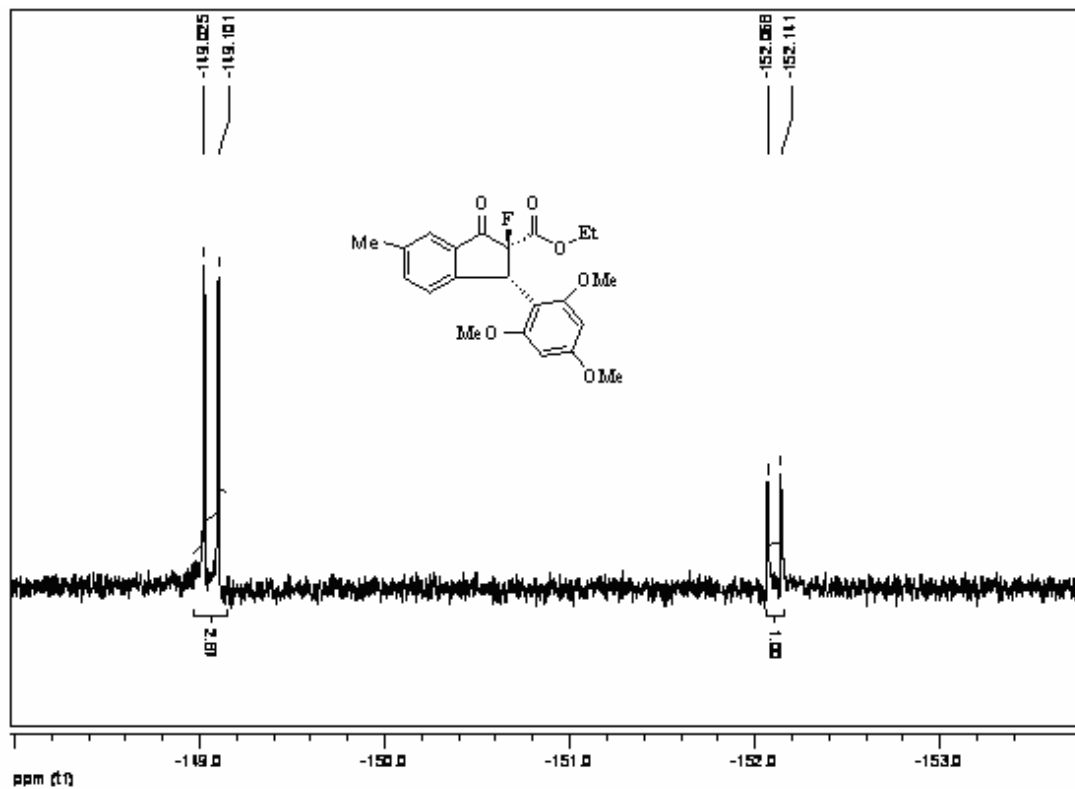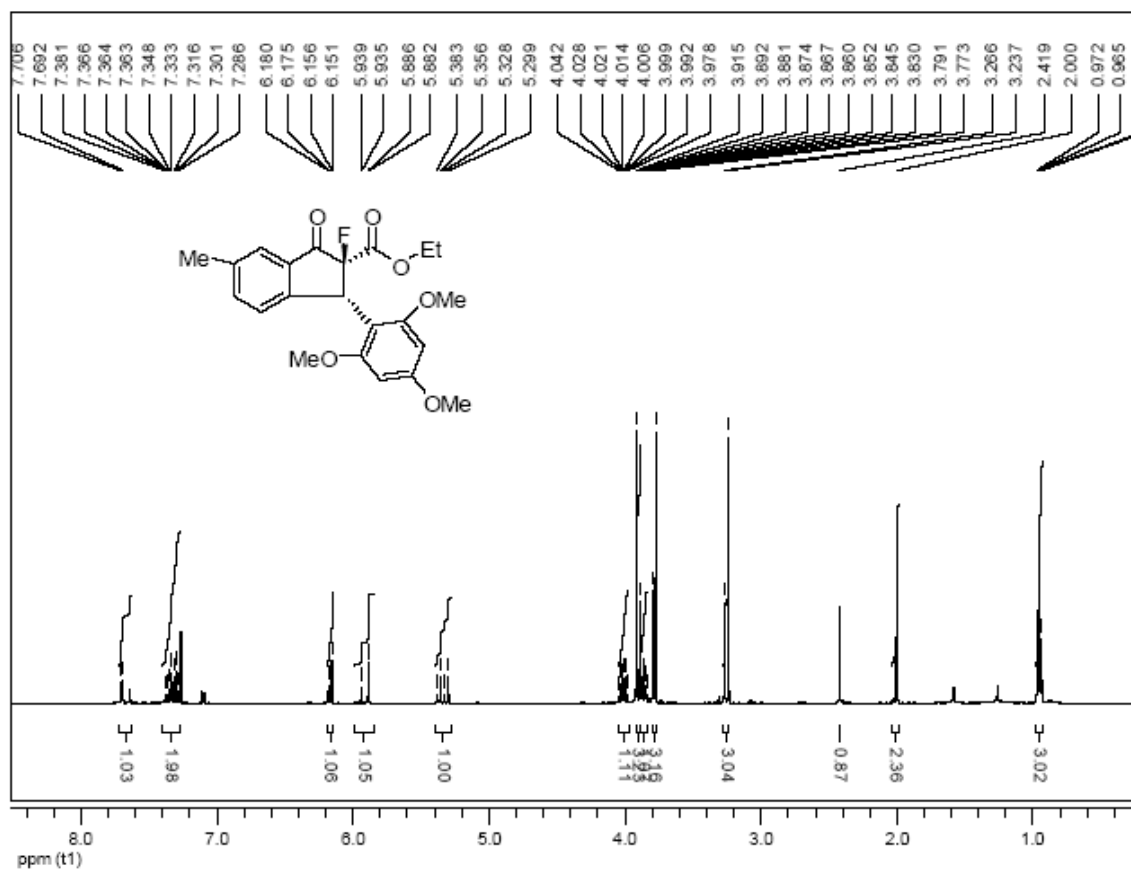

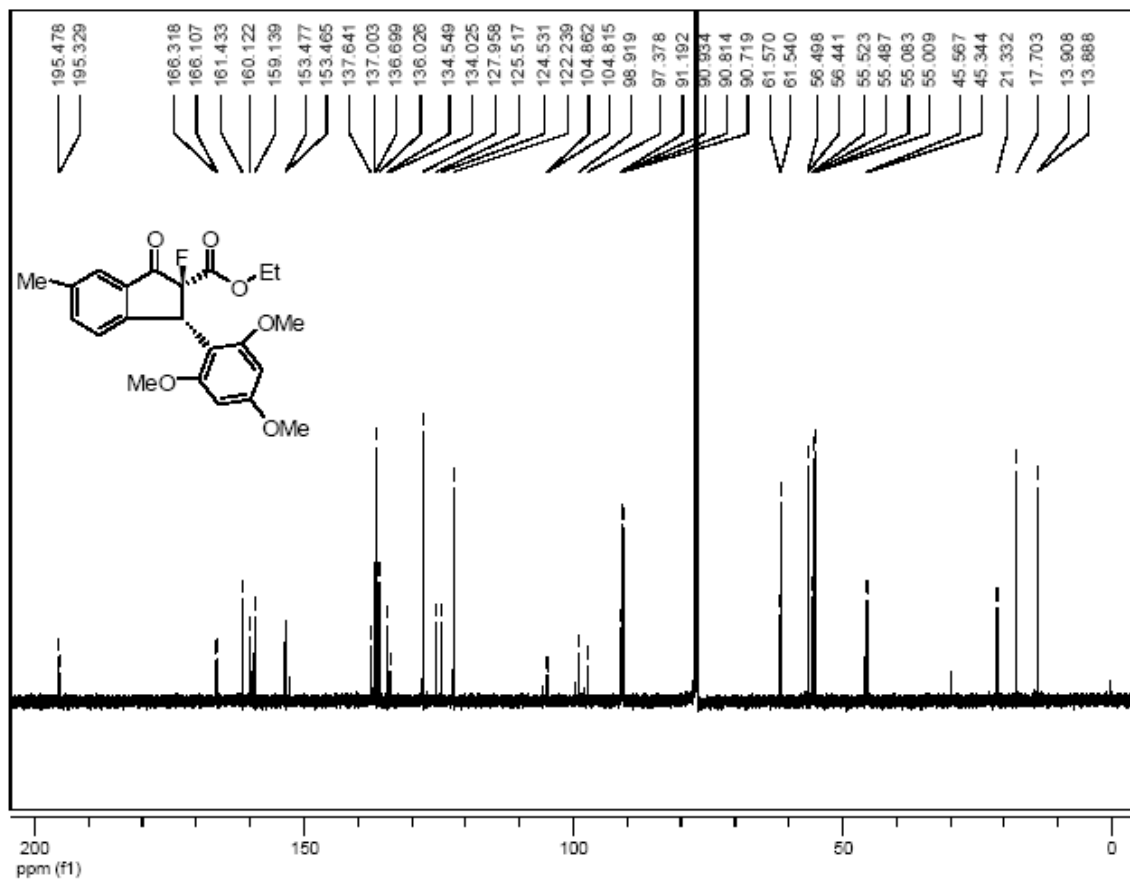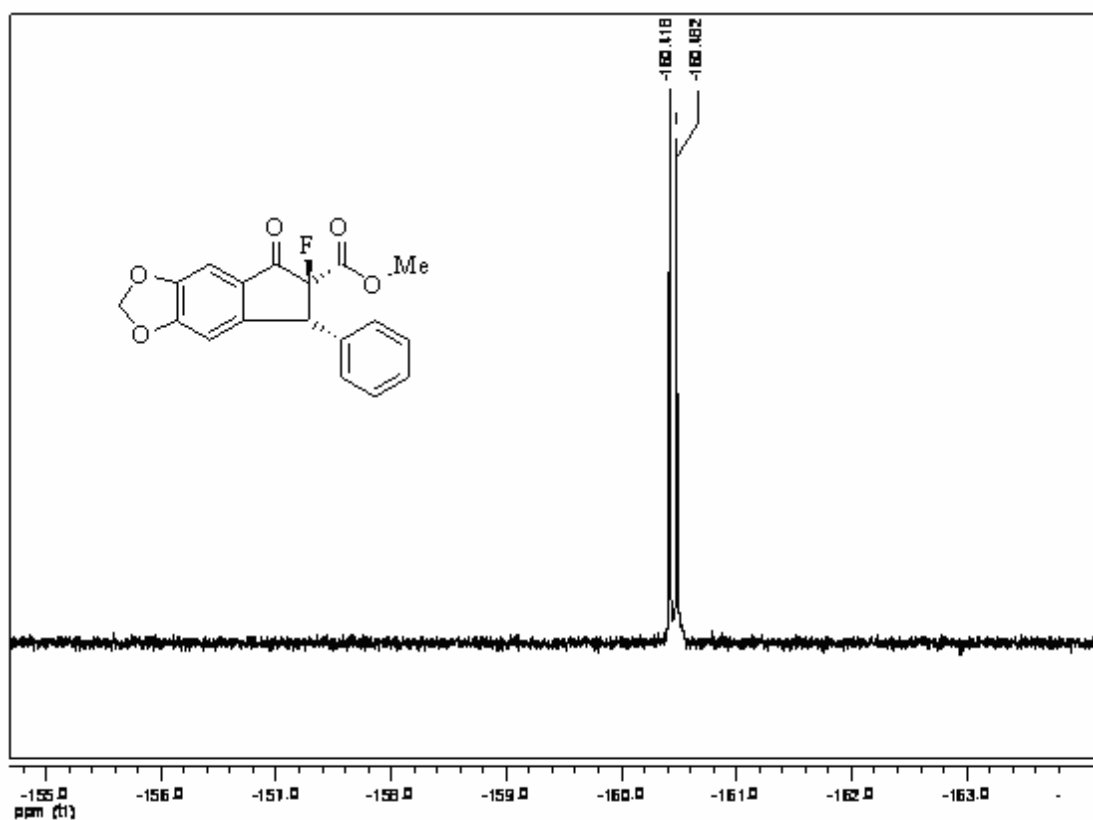

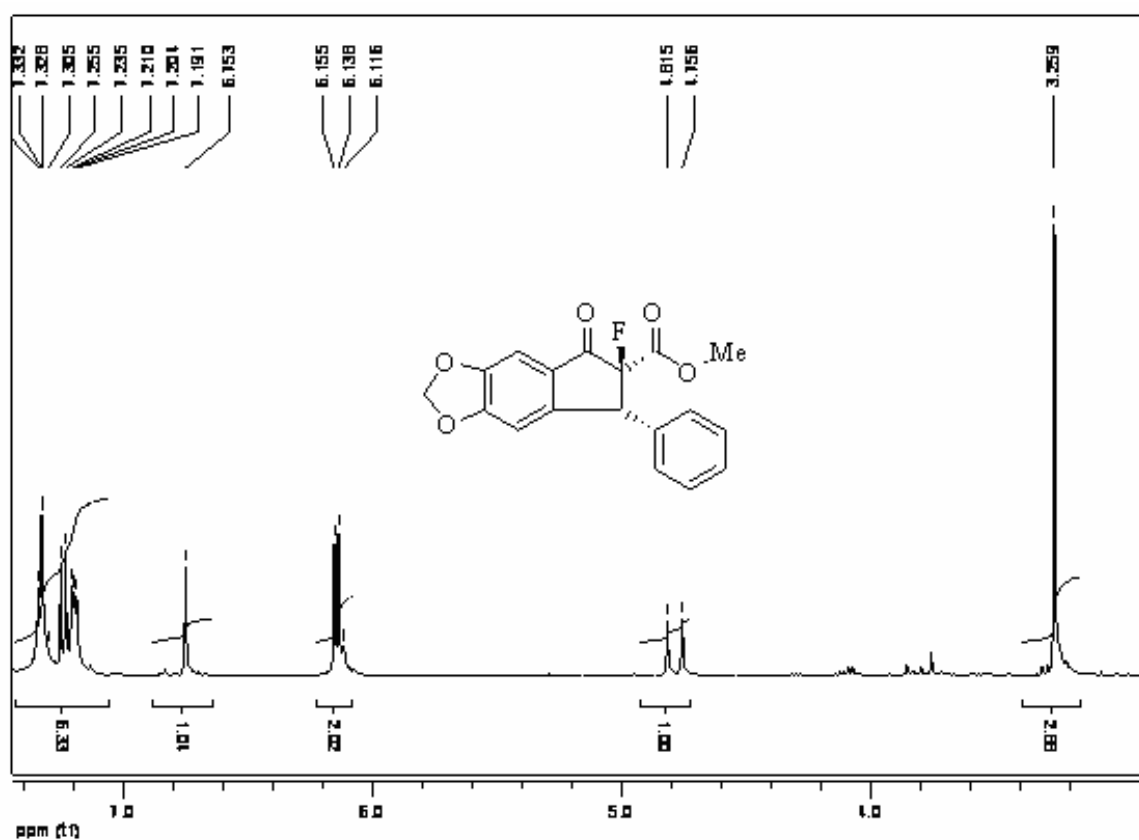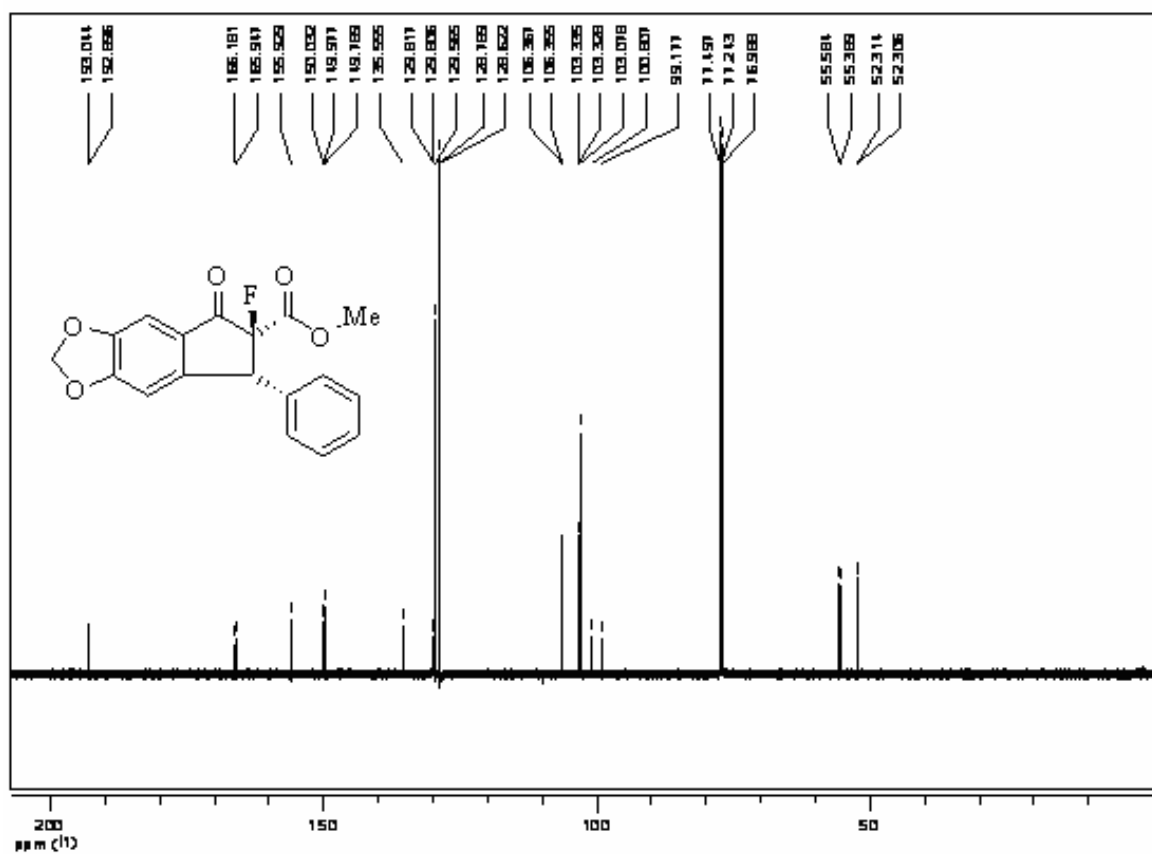

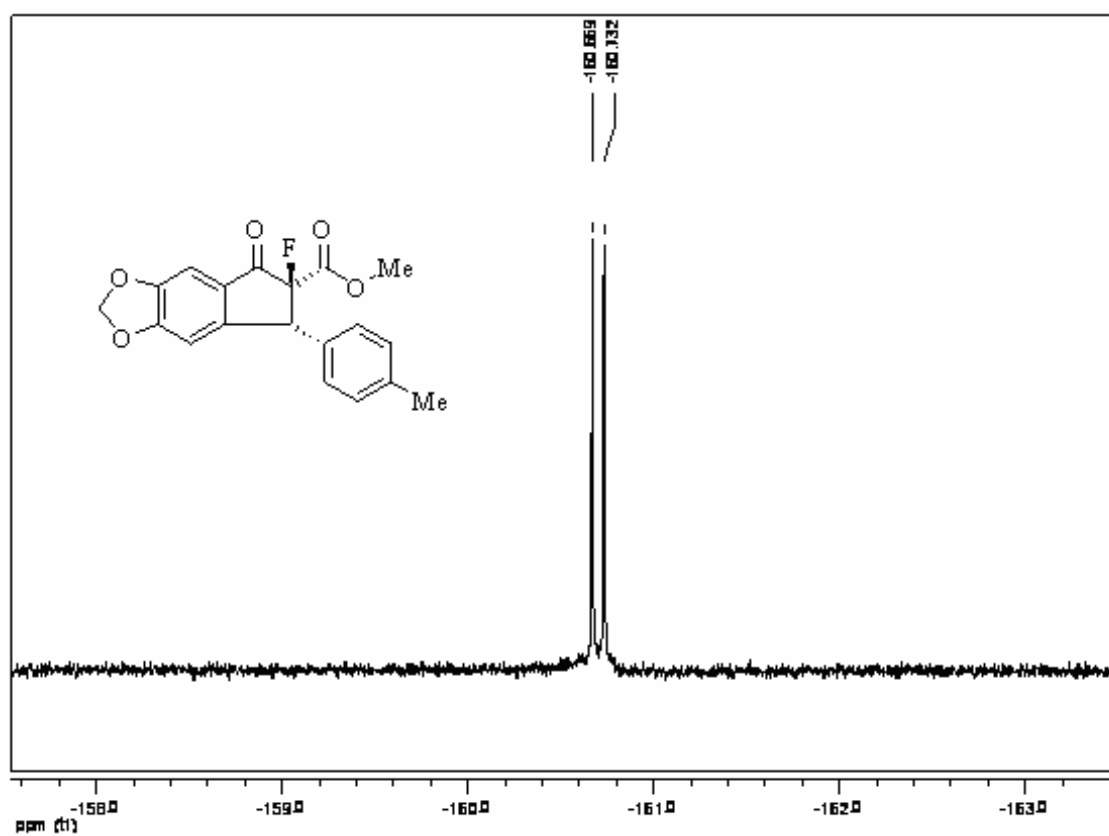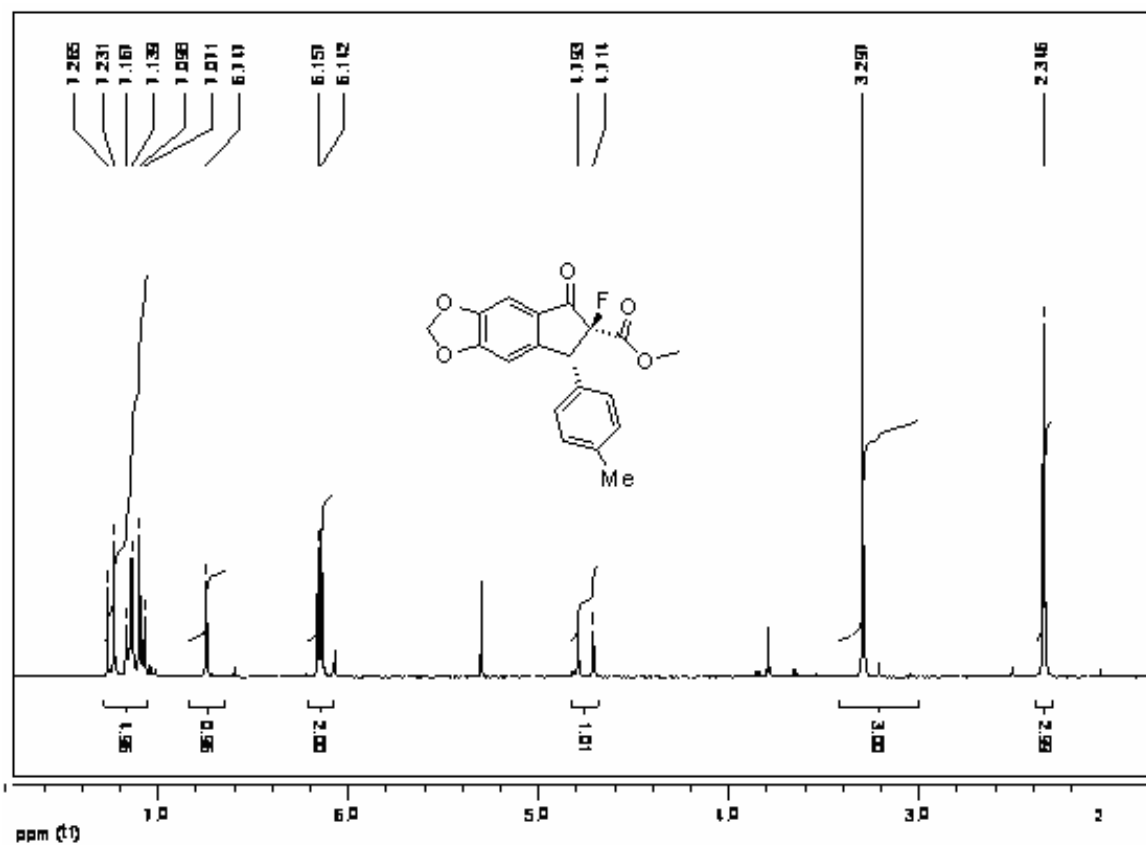

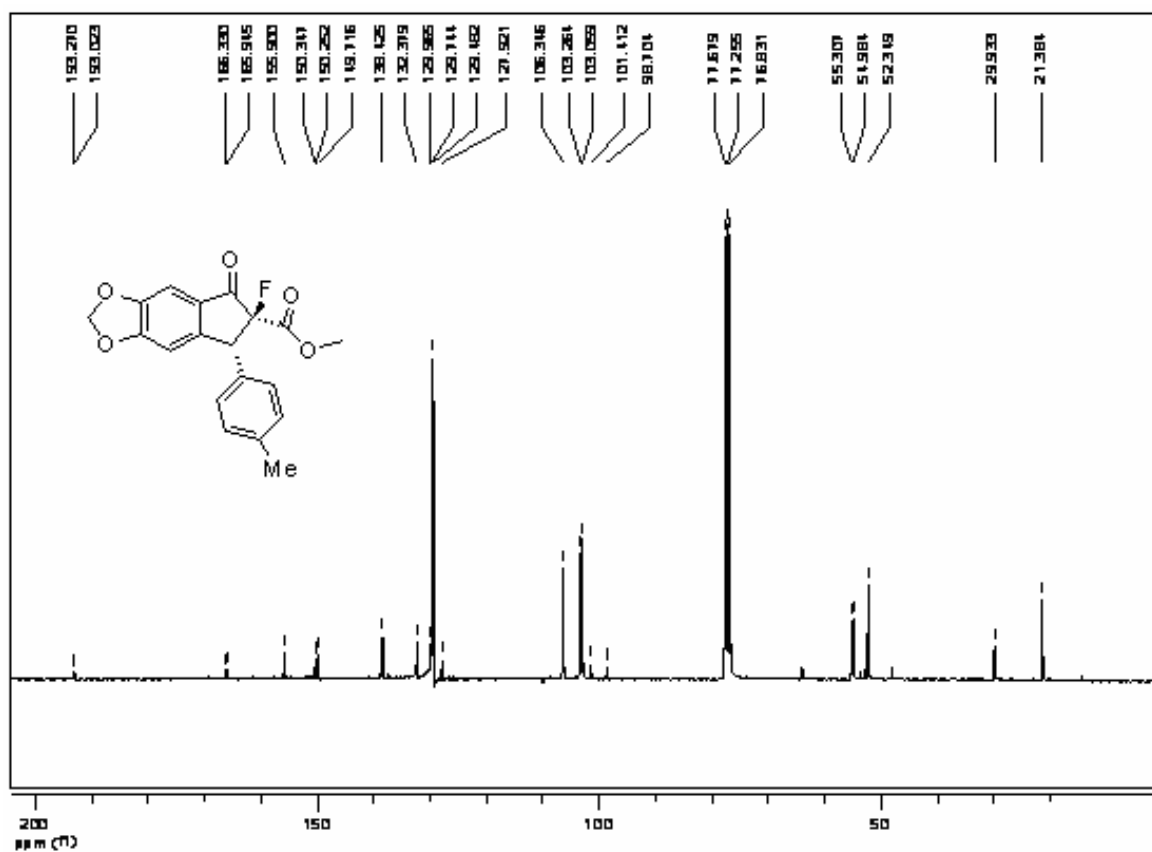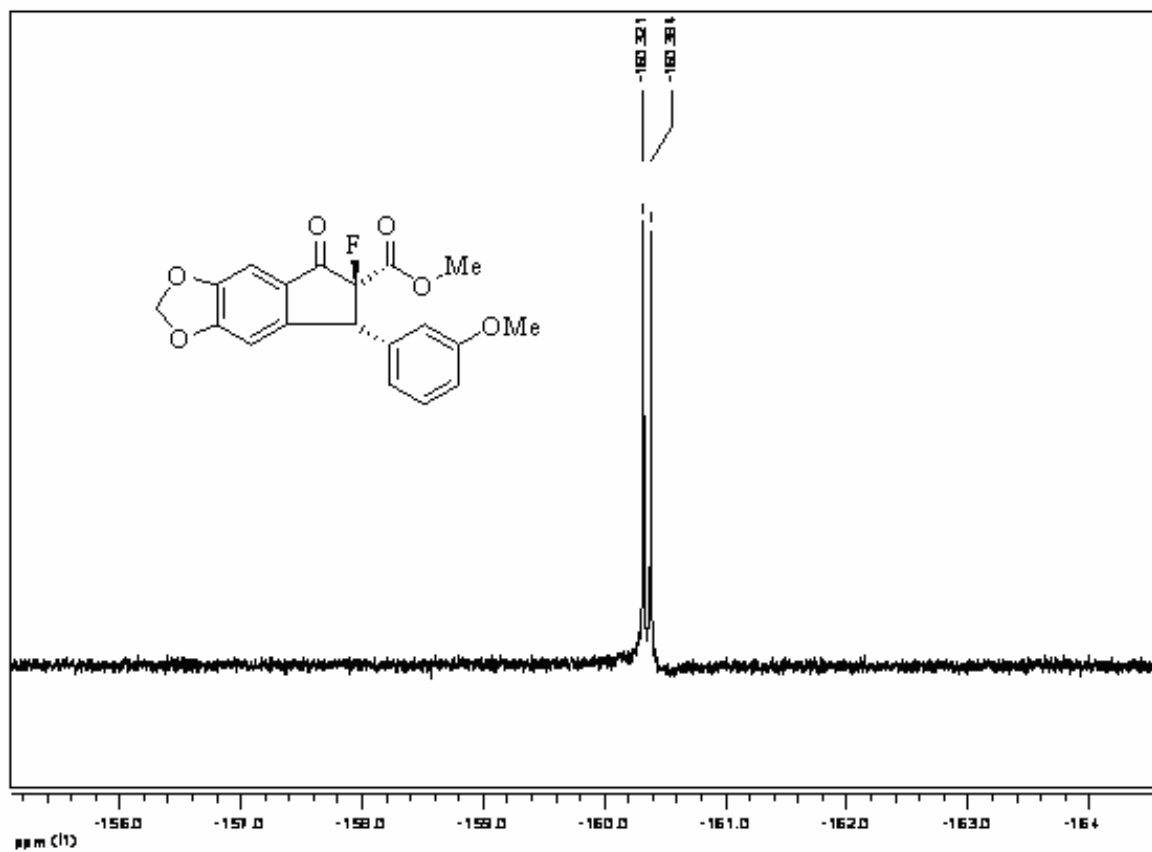



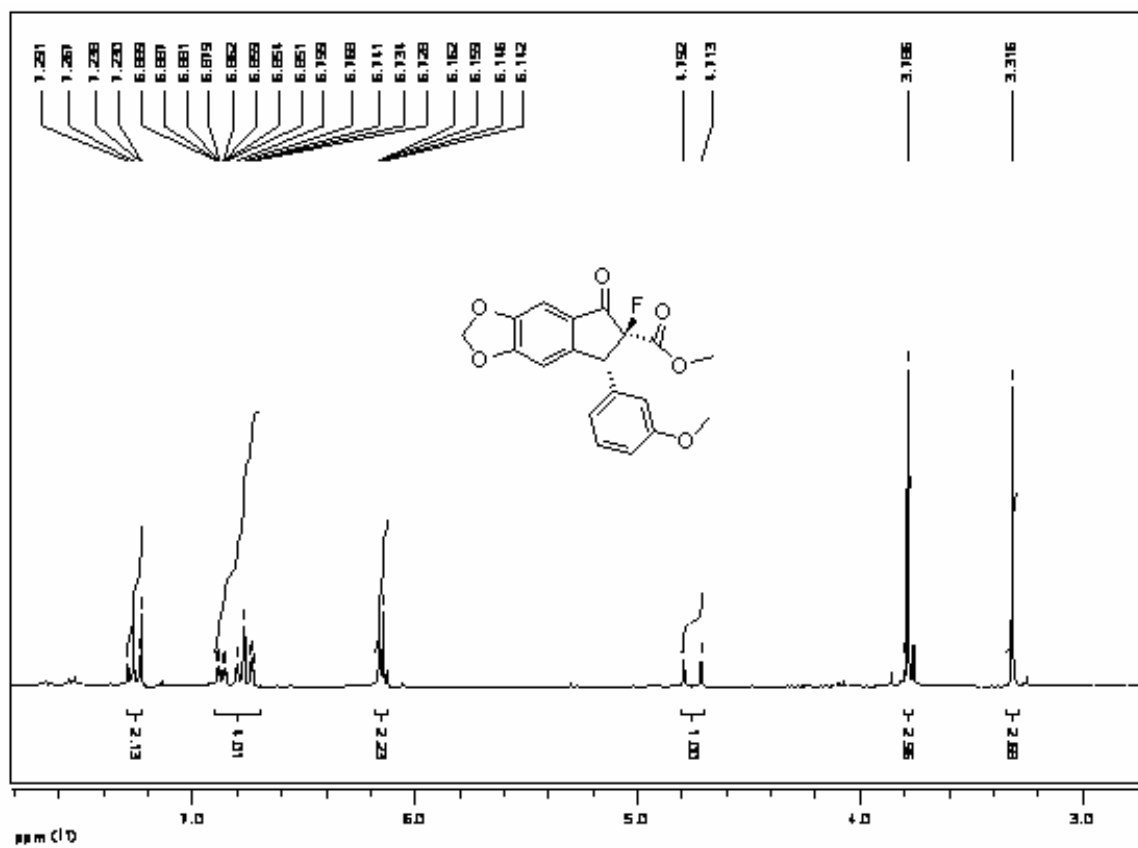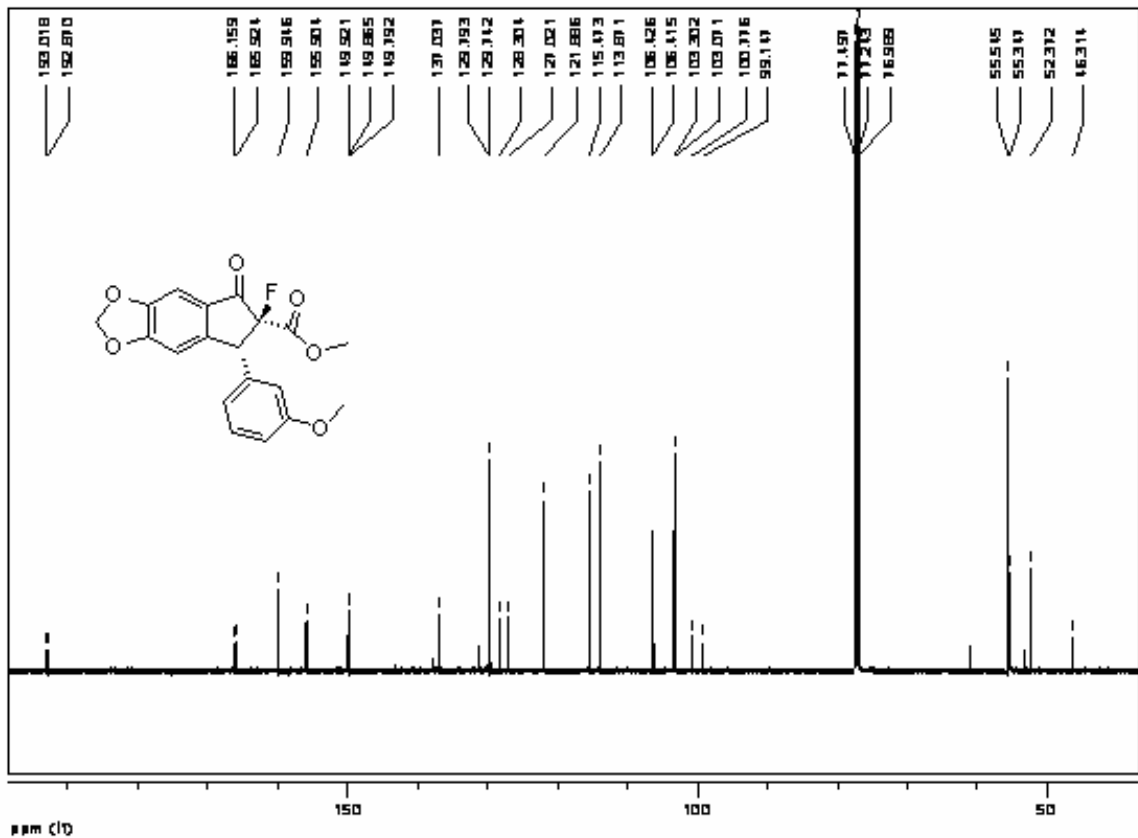



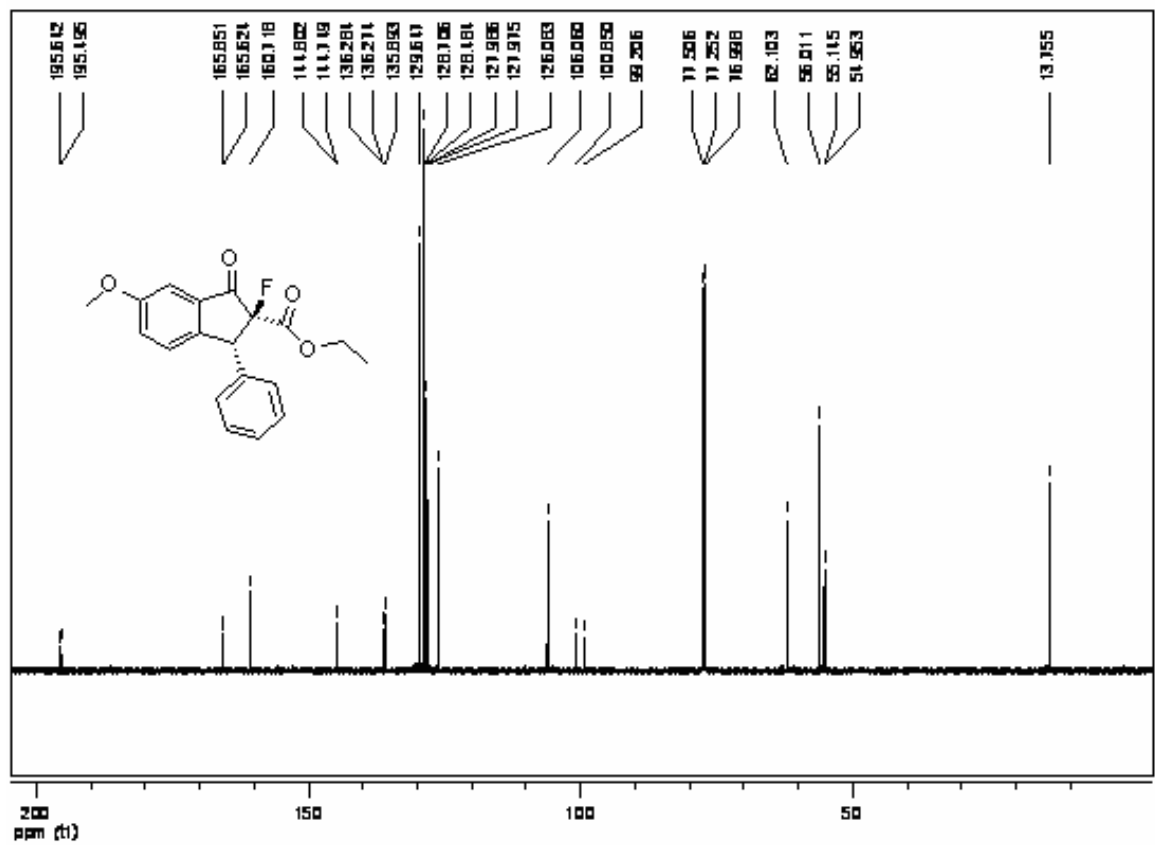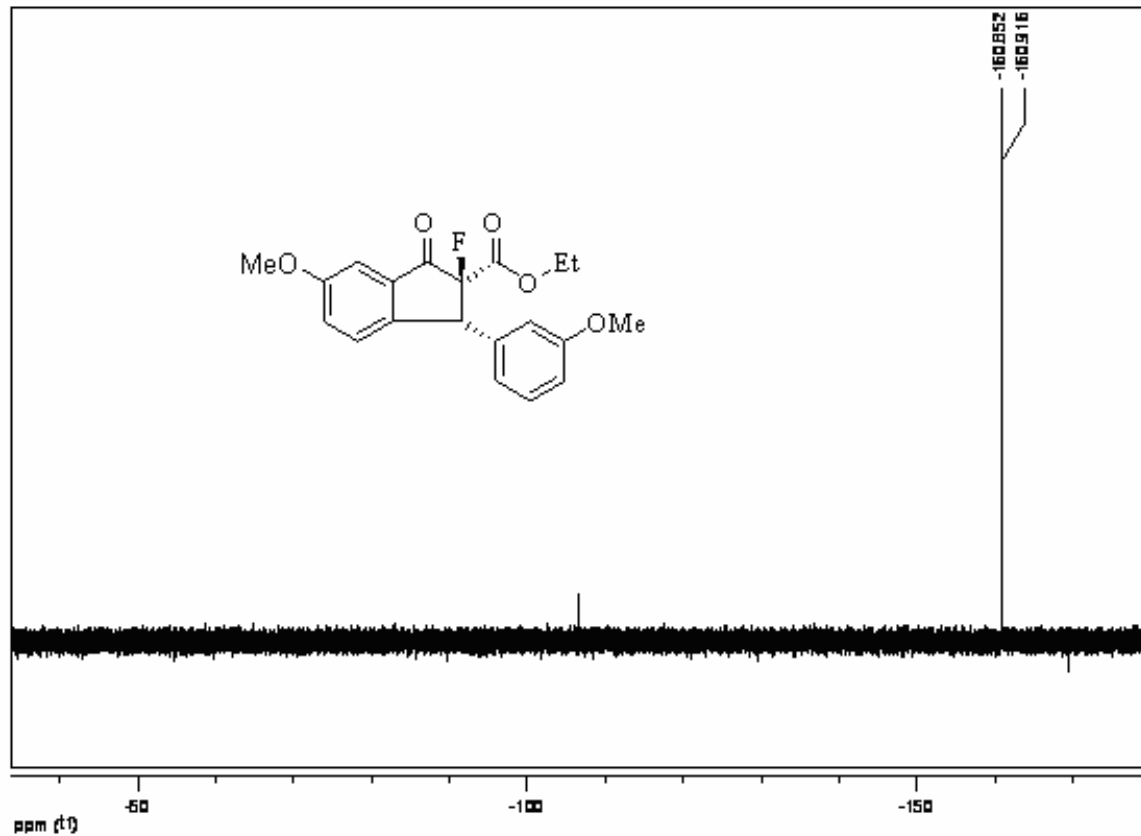

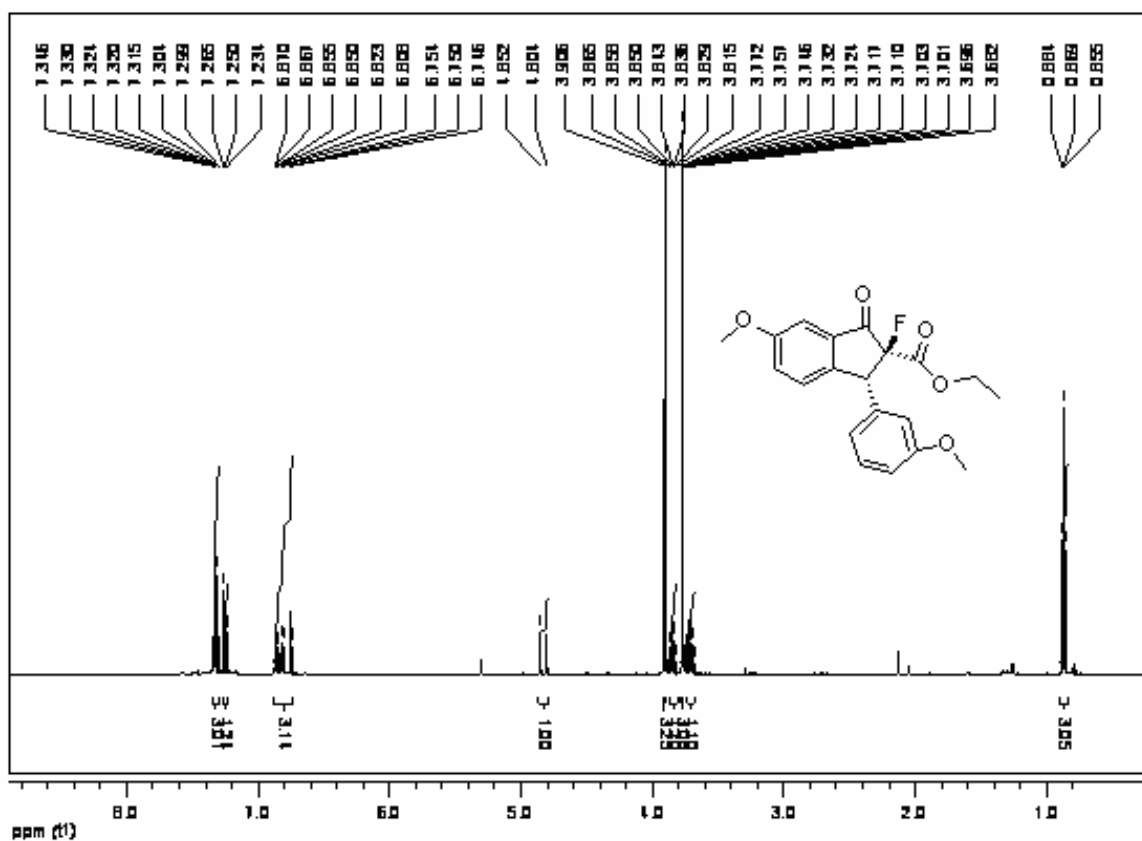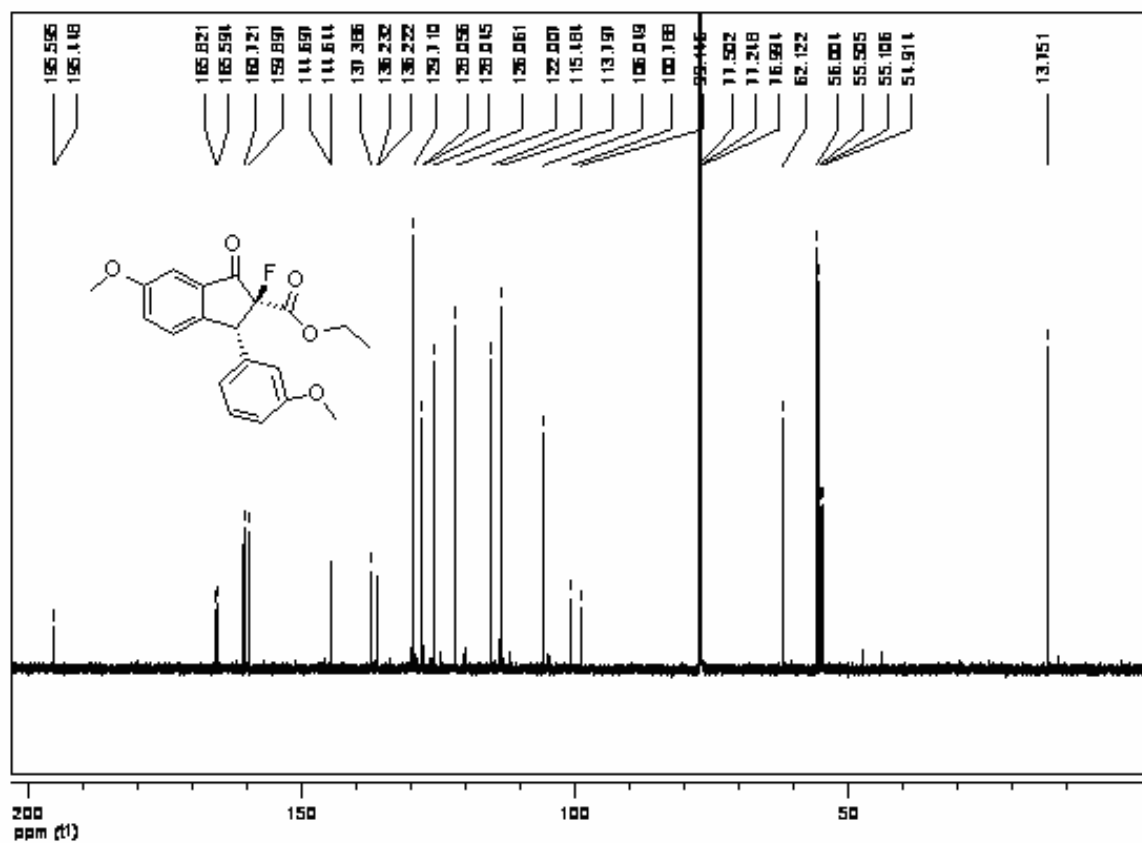



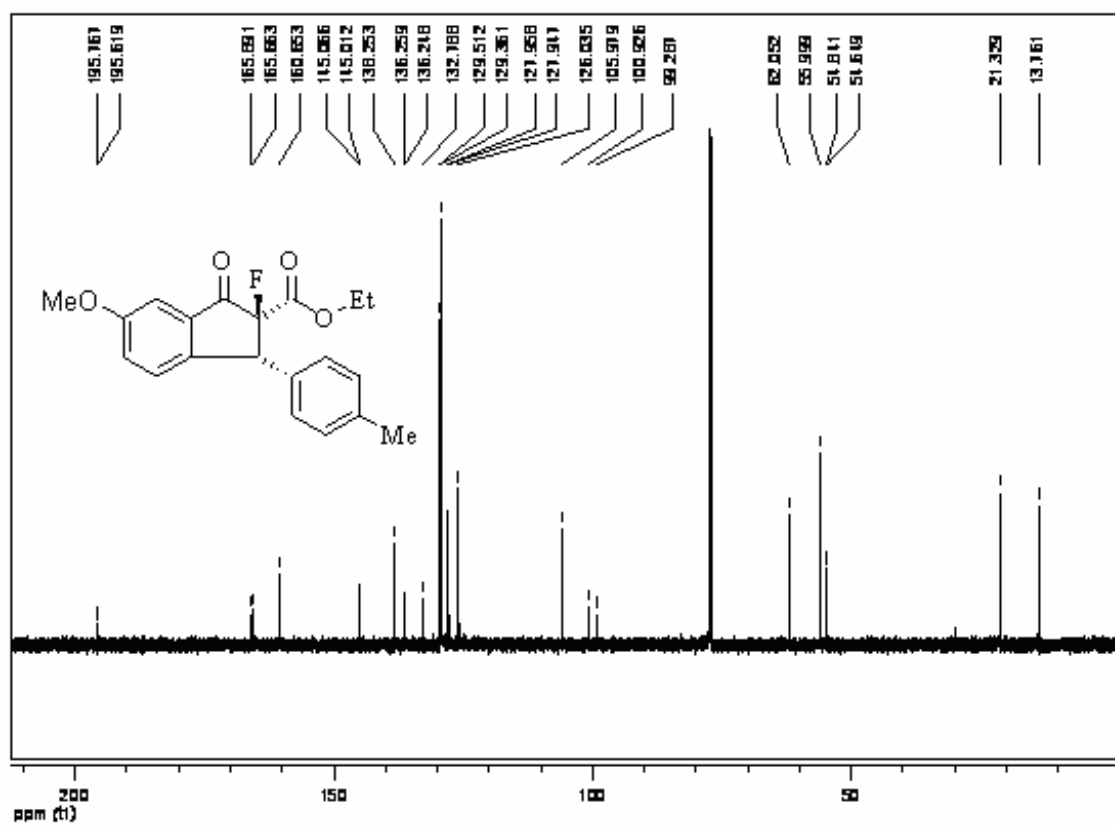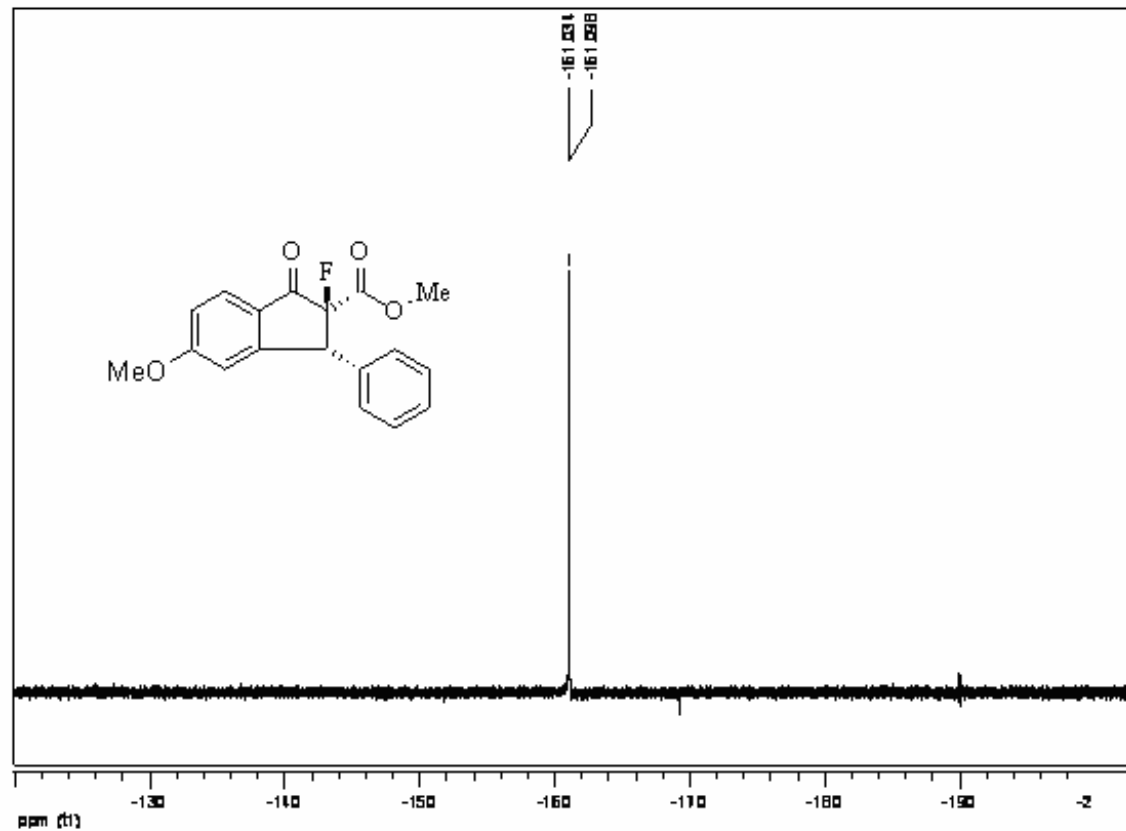

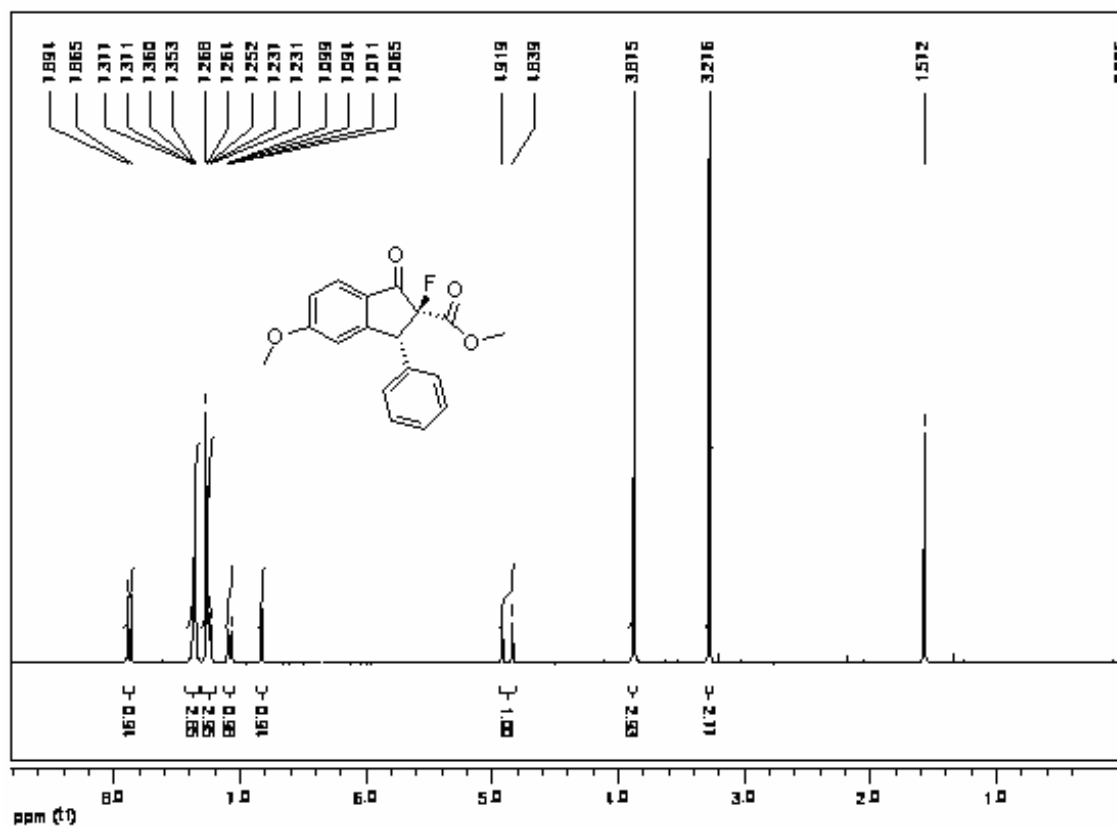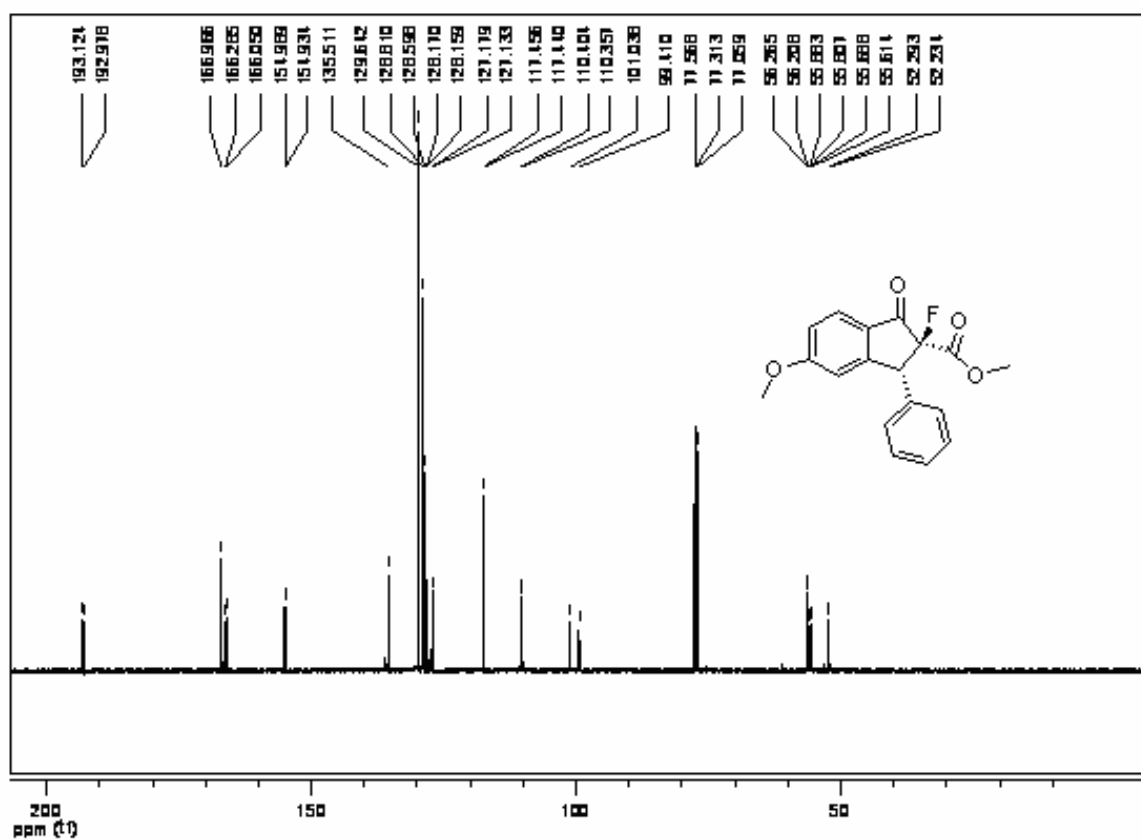

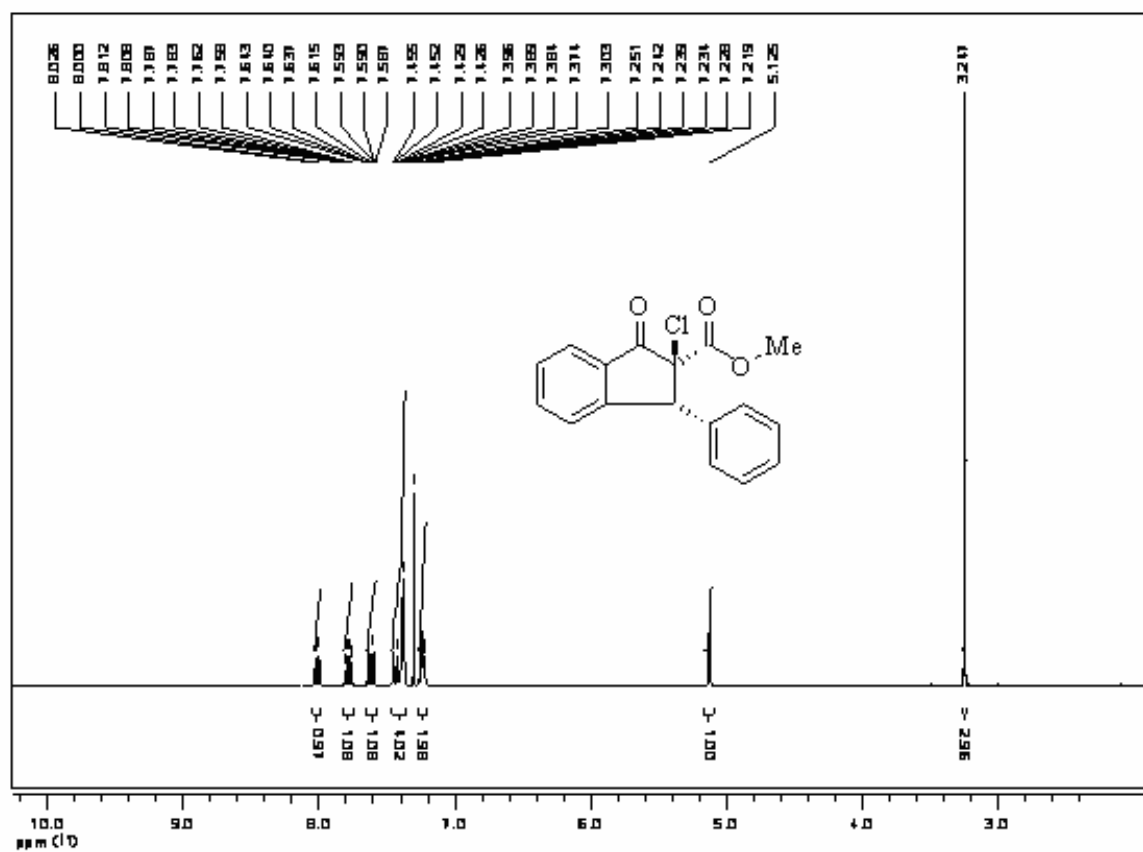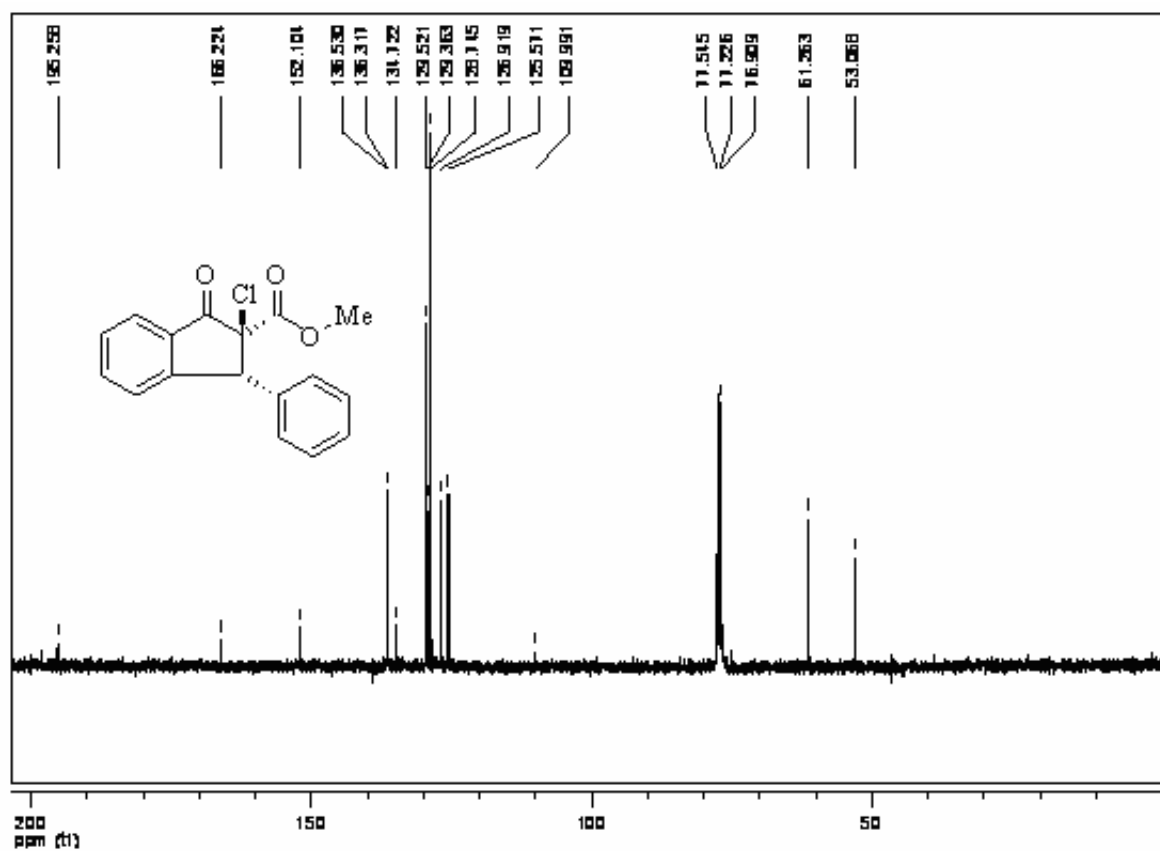



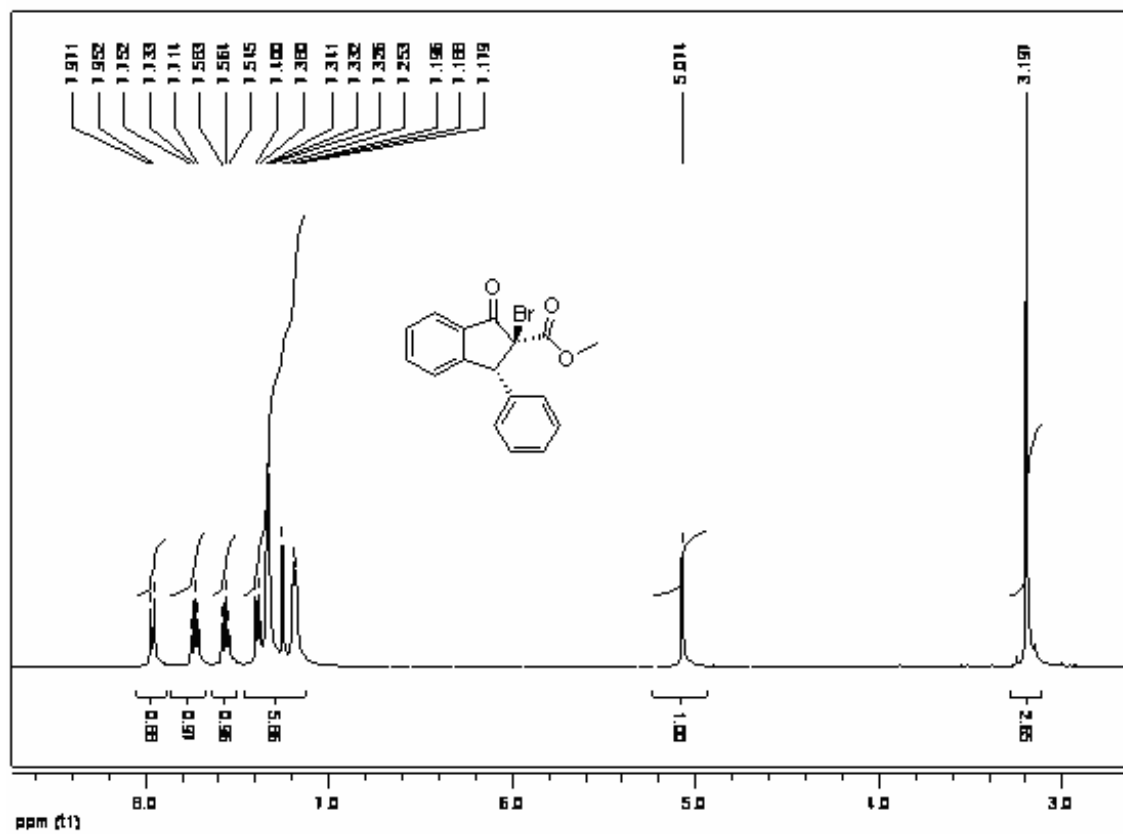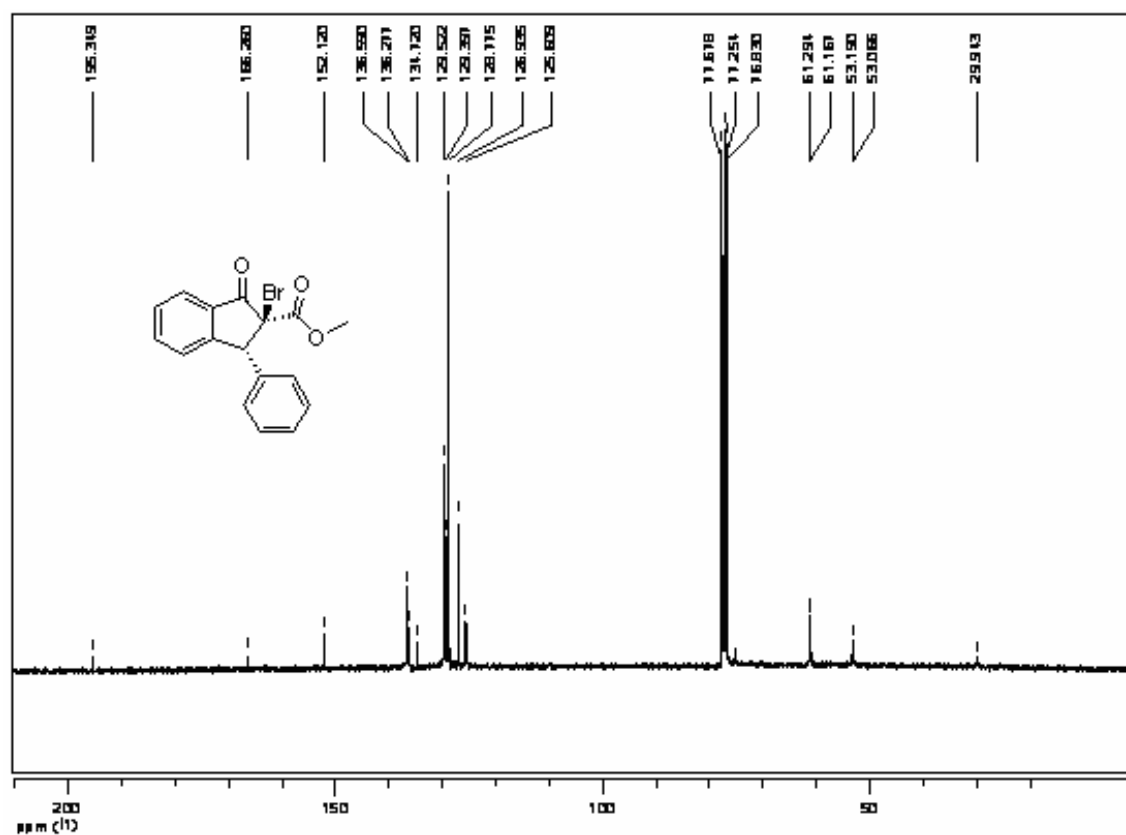

Supplement: b702114c.pdf [file b702114c.pdf]
